# Supplementary material for: NARRMDA: negative-aware and rating-based recommendation algorithm for miRNA–disease association prediction
Source: Royal Society of Chemistry journal article supplement (doi:10.1039/c7mb00499k), 2017-10-11
Supplement: c7mb00499k1.pdf [file c7mb00499k1.pdf]

#### Supplementary information

Table S1: We applied NARRMDA to prioritize all the candidate miRNA-disease pairs based on all the known miRNA-disease associations in HMDD database as training samples. This prediction result is published for further experimental validation and research.
