# Supplementary material for: NARRMDA: negative-aware and rating-based recommendation algorithm for miRNA–disease association prediction
Source: Royal Society of Chemistry journal article supplement (doi:10.1039/c7mb00499k), 2017-10-11
Supplement: c7mb00499k2.xlsx [file c7mb00499k2.xlsx]

## Sheet: score1
Disease	miRNA	Score
Lupus Vulgaris	hsa-mir-21	0.751296
Prostatic Neoplasms	hsa-mir-155	0.735949
Adenoviridae Infections	hsa-mir-21	0.720537
Carcinoma Hepatocellular	hsa-mir-133a	0.676315
Stomach Neoplasms	hsa-mir-29b	0.563566
Stomach Neoplasms	hsa-mir-19b	0.553968
Adenoviridae Infections	hsa-mir-155	0.552005
Heart Failure	hsa-mir-146a	0.54699
Endometriosis	hsa-mir-21	0.53989
Leukemia Myeloid Acute	hsa-mir-21	0.537875
Glioma	hsa-mir-155	0.526618
Lupus Vulgaris	hsa-mir-155	0.520077
Stomach Neoplasms	hsa-mir-133a	0.510573
Adrenocortical Carcinoma	hsa-mir-21	0.498058
Heart Failure	hsa-mir-34a	0.458357
Colorectal Neoplasms	hsa-mir-29b	0.452832
Medulloblastoma	hsa-mir-155	0.440155
Carcinoma Renal Cell	hsa-mir-17	0.429848
Heart Failure	hsa-mir-20a	0.419543
Heart Failure	hsa-mir-125b	0.418413
Carcinoma Hepatocellular	hsa-mir-9	0.412153
Carcinoma Hepatocellular	hsa-mir-34b	0.411312
Carcinoma Hepatocellular	hsa-mir-429	0.407857
Carcinoma Renal Cell	hsa-mir-29a	0.405693
Carcinoma Hepatocellular	hsa-mir-143	0.404798
Stomach Neoplasms	hsa-mir-92a	0.401549
Carcinoma Hepatocellular	hsa-mir-206	0.401136
Stomach Neoplasms	hsa-mir-15a	0.383465
Stomach Neoplasms	hsa-mir-210	0.382894
Nasopharyngeal Neoplasms	hsa-mir-21	0.382282
Lung Neoplasms	hsa-mir-16	0.38145
Breast Neoplasms	hsa-mir-150	0.380953
Heart Failure	hsa-mir-221	0.380225
Stomach Neoplasms	hsa-mir-26a	0.379894
Stomach Neoplasms	hsa-let-7b	0.374367
Breast Neoplasms	hsa-mir-192	0.37337
Carcinoma Hepatocellular	hsa-mir-132	0.373221
Endometriosis	hsa-mir-155	0.372453
Carcinoma Renal Cell	hsa-mir-20a	0.371309
Carcinoma Renal Cell	hsa-mir-125b	0.370942
Stomach Neoplasms	hsa-let-7c	0.362337
Breast Neoplasms	hsa-mir-15b	0.360866
Carcinoma Renal Cell	hsa-mir-29b	0.360176
Breast Neoplasms	hsa-mir-142	0.35682
Carcinoma Renal Cell	hsa-mir-19b	0.352081
Carcinoma Basal Cell	hsa-mir-21	0.350717
Carcinoma Renal Cell	hsa-mir-221	0.343498
Prostatic Neoplasms	hsa-mir-19b	0.34039
Colorectal Neoplasms	hsa-mir-106b	0.337809
Glioma	hsa-mir-146a	0.334458
Gastrointestinal Neoplasms	hsa-mir-21	0.32984
Carcinoma Renal Cell	hsa-mir-133a	0.324439
Carcinoma Hepatocellular	hsa-mir-32	0.322847
Stomach Neoplasms	hsa-mir-15b	0.322639
Pancreatic Neoplasms	hsa-mir-29a	0.321735
Neoplasms	hsa-mir-133a	0.320511
Colorectal Neoplasms	hsa-mir-30b	0.320379
Carcinoma Hepatocellular	hsa-mir-30e	0.31718
Melanoma	hsa-mir-92a	0.31644
Adenoviridae Infections	hsa-mir-146a	0.316027
Colorectal Neoplasms	hsa-mir-223	0.315714
Carcinoma Hepatocellular	hsa-mir-184	0.314822
Stomach Neoplasms	hsa-let-7d	0.312513
Melanoma	hsa-mir-223	0.310994
Colorectal Neoplasms	hsa-mir-15a	0.31048
Stomach Neoplasms	hsa-let-7e	0.309836
Carcinoma Hepatocellular	hsa-mir-23b	0.309657
Carcinoma Renal Cell	hsa-mir-18a	0.308422
Carcinoma Non-Small-Cell Lung	hsa-mir-29a	0.307079
Lung Neoplasms	hsa-mir-106b	0.305734
Stomach Neoplasms	hsa-let-7i	0.303175
Retinoblastoma	hsa-mir-21	0.299859
Breast Neoplasms	hsa-mir-212	0.299637
Schizophrenia	hsa-mir-21	0.298541
Prostatic Neoplasms	hsa-mir-18a	0.298231
Breast Neoplasms	hsa-mir-106a	0.294936
Breast Neoplasms	hsa-mir-372	0.294592
Heart Failure	hsa-mir-200b	0.293522
Heart Failure	hsa-mir-222	0.293121
Carcinoma Hepatocellular	hsa-mir-204	0.292958
Carcinoma Renal Cell	hsa-mir-1	0.292038
Carcinoma Squamous Cell	hsa-mir-17	0.290938
Neoplasms	hsa-mir-1	0.28856
Lupus Vulgaris	hsa-mir-17	0.28842
Prostatic Neoplasms	hsa-mir-19a	0.286018
Carcinoma Hepatocellular	hsa-mir-494	0.285144
Carcinoma Non-Small-Cell Lung	hsa-mir-20a	0.28267
Colorectal Neoplasms	hsa-mir-214	0.281414
Pancreatic Neoplasms	hsa-mir-19b	0.279301
Lung Neoplasms	hsa-mir-15a	0.27921
Breast Neoplasms	hsa-mir-32	0.278861
Heart Failure	hsa-mir-15a	0.275203
Glioma	hsa-mir-29a	0.274352
Lupus Vulgaris	hsa-mir-29a	0.27406
Carcinoma Squamous Cell	hsa-mir-29a	0.274001
Lupus Vulgaris	hsa-mir-34a	0.27337
Stomach Neoplasms	hsa-mir-205	0.273188
Breast Neoplasms	hsa-mir-30e	0.272601
Carcinoma Hepatocellular	hsa-mir-424	0.272345
Ovarian Neoplasms	hsa-mir-222	0.272226
Colorectal Neoplasms	hsa-mir-29c	0.272035
Melanoma	hsa-mir-29c	0.270306
Carcinoma Hepatocellular	hsa-mir-328	0.270296
Glioblastoma	hsa-mir-29b	0.269935
Carcinoma Non-Small-Cell Lung	hsa-mir-19b	0.268628
Stomach Neoplasms	hsa-mir-23a	0.267607
Melanoma	hsa-mir-150	0.26663
Breast Neoplasms	hsa-mir-184	0.266224
Carcinoma Hepatocellular	hsa-mir-27b	0.266064
Colorectal Neoplasms	hsa-mir-192	0.265564
Adenoviridae Infections	hsa-mir-29a	0.265253
Ovarian Neoplasms	hsa-mir-196a	0.264882
Melanoma	hsa-mir-192	0.264392
Carcinoma Renal Cell	hsa-mir-222	0.263706
Stomach Neoplasms	hsa-mir-30a	0.261823
Urinary Bladder Neoplasms	hsa-mir-29a	0.260708
Carcinoma Hepatocellular	hsa-mir-302a	0.258947
Stomach Neoplasms	hsa-mir-203	0.258876
Colorectal Neoplasms	hsa-mir-15b	0.257995
Carcinoma Hepatocellular	hsa-mir-137	0.257581
Pancreatic Neoplasms	hsa-mir-133a	0.256291
Ovarian Neoplasms	hsa-mir-15a	0.256114
Carcinoma Hepatocellular	hsa-mir-525	0.255466
Carcinoma Hepatocellular	hsa-mir-342	0.255323
Carcinoma Renal Cell	hsa-mir-30b	0.254279
Neoplasms	hsa-mir-30b	0.253966
Ovarian Neoplasms	hsa-mir-26a	0.253663
Heart Failure	hsa-mir-214	0.253591
Glioblastoma	hsa-mir-199a	0.253398
Neoplasms	hsa-mir-196a	0.253371
Breast Neoplasms	hsa-mir-548b	0.253135
Ovarian Neoplasms	hsa-mir-210	0.252223
Carcinoma Renal Cell	hsa-mir-223	0.250707
Breast Neoplasms	hsa-mir-503	0.250261
Colorectal Neoplasms	hsa-let-7d	0.249744
Lupus Vulgaris	hsa-mir-20a	0.249541
Breast Neoplasms	hsa-mir-208b	0.249188
Heart Failure	hsa-mir-200a	0.249163
Lupus Vulgaris	hsa-mir-125b	0.249121
Neoplasms	hsa-mir-223	0.24893
Pituitary Neoplasms	hsa-mir-21	0.247478
Prostatic Neoplasms	hsa-mir-196a	0.246141
Carcinoma Non-Small-Cell Lung	hsa-mir-133a	0.24613
Breast Neoplasms	hsa-mir-134	0.245953
Prostatic Neoplasms	hsa-mir-30b	0.245813
Carcinoma Renal Cell	hsa-mir-15a	0.245784
Breast Neoplasms	hsa-mir-483	0.245629
Glioblastoma	hsa-mir-133a	0.244704
Breast Neoplasms	hsa-mir-494	0.244621
Colorectal Neoplasms	hsa-mir-125a	0.244573
Colorectal Neoplasms	hsa-let-7f	0.243965
Breast Neoplasms	hsa-mir-571	0.243965
Glioma	hsa-mir-29b	0.243574
Lupus Vulgaris	hsa-mir-29b	0.243466
Stomach Neoplasms	hsa-mir-30e	0.243384
Esophageal Neoplasms	hsa-mir-17	0.243273
Carcinoma Squamous Cell	hsa-mir-29b	0.242953
Colorectal Neoplasms	hsa-let-7i	0.24261
Hepatitis B	hsa-mir-21	0.242499
Carcinoma Basal Cell	hsa-mir-155	0.2422
Adenoviridae Infections	hsa-mir-20a	0.241869
Heart Failure	hsa-mir-29c	0.241718
Carcinoma Hepatocellular	hsa-mir-193b	0.241607
Glioma	hsa-mir-19b	0.241365
Neoplasms	hsa-mir-26a	0.240961
Melanoma	hsa-mir-206	0.240243
Lupus Vulgaris	hsa-mir-145	0.239874
Stomach Neoplasms	hsa-mir-519d	0.23885
Endometriosis	hsa-mir-146a	0.238703
Glioblastoma	hsa-mir-126	0.238047
Carcinoma Hepatocellular	hsa-mir-28	0.237895
Heart Failure	hsa-mir-141	0.236485
Stomach Neoplasms	hsa-mir-23b	0.236341
Rectal Neoplasms	hsa-mir-155	0.235794
Adenoviridae Infections	hsa-mir-29b	0.235664
Lung Neoplasms	hsa-mir-141	0.235564
Lupus Vulgaris	hsa-mir-19b	0.235464
Pancreatic Neoplasms	hsa-mir-19a	0.235169
Carcinoma Non-Small-Cell Lung	hsa-mir-18a	0.234579
Prostatic Neoplasms	hsa-mir-210	0.234136
Head and Neck Neoplasms	hsa-mir-146a	0.233692
Breast Neoplasms	hsa-mir-424	0.233568
Lung Neoplasms	hsa-mir-15b	0.233504
Heart Failure	hsa-mir-519d	0.233429
Lung Neoplasms	hsa-mir-122	0.232656
Carcinoma Hepatocellular	hsa-mir-663a	0.232617
Medulloblastoma	hsa-mir-29a	0.232462
Lupus Vulgaris	hsa-mir-199a	0.232447
Melanoma	hsa-mir-27a	0.231569
Breast Neoplasms	hsa-mir-181c	0.231341
Adenoviridae Infections	hsa-mir-145	0.231295
Autistic Disorder	hsa-mir-155	0.230939
Pancreatic Neoplasms	hsa-mir-1	0.23079
Carcinoma Squamous Cell	hsa-mir-221	0.230748
Lupus Vulgaris	hsa-mir-221	0.230332
Carcinoma Hepatocellular	hsa-mir-323a	0.230303
Lung Neoplasms	hsa-mir-195	0.229886
Breast Neoplasms	hsa-mir-208a	0.229878
Lupus Vulgaris	hsa-mir-133a	0.229809
Colorectal Neoplasms	hsa-mir-132	0.229523
Gastrointestinal Neoplasms	hsa-mir-155	0.229117
Melanoma	hsa-mir-373	0.229094
Carcinoma Hepatocellular	hsa-mir-26b	0.228403
Carcinoma Squamous Cell	hsa-mir-199a	0.228113
Glioma	hsa-mir-199a	0.227792
Adenoviridae Infections	hsa-mir-199a	0.226919
Melanoma	hsa-mir-132	0.226509
Esophageal Neoplasms	hsa-mir-29a	0.226211
Lung Neoplasms	hsa-mir-429	0.225812
Ovarian Neoplasms	hsa-mir-29c	0.225601
Breast Neoplasms	hsa-mir-130a	0.225497
Carcinoma Renal Cell	hsa-mir-214	0.22547
Carcinoma Non-Small-Cell Lung	hsa-mir-19a	0.225407
Carcinoma Hepatocellular	hsa-mir-433	0.225313
Ovarian Neoplasms	hsa-mir-150	0.225187
Breast Neoplasms	hsa-mir-362	0.22505
Heart Failure	hsa-mir-9	0.224907
Lupus Vulgaris	hsa-mir-16	0.224653
Stomach Neoplasms	hsa-mir-208b	0.224354
Heart Failure	hsa-mir-122	0.223802
Neoplasms Squamous Cell	hsa-mir-155	0.222528
Glioblastoma	hsa-mir-1	0.222114
Breast Neoplasms	hsa-mir-491	0.22178
Ovarian Neoplasms	hsa-mir-181a	0.221188
Stomach Neoplasms	hsa-mir-219	0.220592
Carcinoma Hepatocellular	hsa-mir-363	0.220236
Heart Failure	hsa-mir-143	0.220072
Carcinoma Hepatocellular	hsa-mir-371a	0.219683
Adenoviridae Infections	hsa-mir-221	0.219523
Glioma	hsa-mir-133a	0.219077
Stomach Neoplasms	hsa-mir-483	0.218831
Colorectal Neoplasms	hsa-mir-205	0.218102
Urinary Bladder Neoplasms	hsa-mir-16	0.217923
Stomach Neoplasms	hsa-mir-134	0.217789
Heart Failure	hsa-mir-206	0.217469
Pancreatic Neoplasms	hsa-mir-106b	0.217402
Colorectal Neoplasms	hsa-mir-212	0.217205
Colorectal Neoplasms	hsa-mir-101	0.217089
Heart Failure	hsa-let-7i	0.216993
Azoospermia	hsa-mir-21	0.216194
Adenoviridae Infections	hsa-mir-16	0.216093
Carcinoma Renal Cell	hsa-mir-181a	0.215802
Melanoma	hsa-mir-101	0.215708
Carcinoma Hepatocellular	hsa-mir-339	0.21534
Ovarian Neoplasms	hsa-mir-15b	0.214417
Glioma	hsa-mir-126	0.213252
Neuroblastoma	hsa-mir-155	0.212923
Heart Failure	hsa-mir-146b	0.212299
Heart Failure	hsa-mir-93	0.212263
Melanoma	hsa-mir-212	0.21213
Lupus Vulgaris	hsa-mir-126	0.211971
Ovarian Neoplasms	hsa-mir-122	0.211968
Ovarian Neoplasms	hsa-mir-195	0.211688
Esophageal Neoplasms	hsa-mir-125b	0.211189
Carcinoma Renal Cell	hsa-mir-192	0.211127
Ovarian Neoplasms	hsa-mir-142	0.210913
Mesothelioma	hsa-mir-155	0.210342
Adenoviridae Infections	hsa-mir-133a	0.210197
Carcinoma Hepatocellular	hsa-mir-194	0.210196
Melanoma	hsa-mir-23a	0.209871
Neoplasms	hsa-mir-192	0.209835
Carcinoma Hepatocellular	hsa-mir-95	0.20973
Stomach Neoplasms	hsa-mir-424	0.209729
Adenoviridae Infections	hsa-mir-126	0.209616
Schizophrenia	hsa-mir-155	0.208439
Prostatic Neoplasms	hsa-mir-150	0.208315
Carcinoma Hepatocellular	hsa-mir-153	0.208245
Lung Neoplasms	hsa-mir-373	0.207977
Prostatic Neoplasms	hsa-mir-29c	0.207532
Head and Neck Neoplasms	hsa-mir-17	0.20695
Breast Neoplasms	hsa-mir-548c	0.206555
Medulloblastoma	hsa-mir-29b	0.20646
Carcinoma Non-Small-Cell Lung	hsa-mir-106b	0.206121
Lupus Vulgaris	hsa-mir-18a	0.205985
Carcinoma Renal Cell	hsa-mir-148a	0.205701
Carcinoma Renal Cell	hsa-mir-15b	0.20563
Retinoblastoma	hsa-mir-155	0.204893
Prostatic Neoplasms	hsa-mir-181a	0.204866
Glioblastoma	hsa-mir-106b	0.20384
Breast Neoplasms	hsa-mir-517a	0.203754
Ovarian Neoplasms	hsa-mir-143	0.20374
Breast Neoplasms	hsa-mir-525	0.203715
Breast Neoplasms	hsa-mir-28	0.203499
Stomach Neoplasms	hsa-mir-208a	0.20343
Glioma	hsa-mir-19a	0.203325
Neoplasms	hsa-mir-142	0.20319
Prostatic Neoplasms	hsa-mir-192	0.203176
Neoplasms	hsa-mir-148a	0.203102
Endometrial Neoplasms	hsa-mir-146a	0.202941
Pancreatic Neoplasms	hsa-mir-30b	0.202586
Melanoma	hsa-mir-32	0.202202
Ovarian Neoplasms	hsa-mir-206	0.202172
Carcinoma Hepatocellular	hsa-mir-367	0.20214
Neoplasms	hsa-mir-195	0.201796
Carcinoma Hepatocellular	hsa-mir-196b	0.201725
Melanoma	hsa-mir-372	0.201453
Esophageal Neoplasms	hsa-mir-29b	0.201027
Colorectal Neoplasms	hsa-mir-24	0.200643
Colorectal Neoplasms	hsa-mir-32	0.200476
Carcinoma Squamous Cell	hsa-mir-19a	0.200263
Adenocarcinoma	hsa-mir-146a	0.200078
Carcinoma Hepatocellular	hsa-mir-574	0.199528
Endometriosis	hsa-mir-34a	0.199436
Esophageal Neoplasms	hsa-mir-19b	0.199173
Lupus Vulgaris	hsa-mir-1	0.199128
Carcinoma Hepatocellular	hsa-mir-509	0.198466
Breast Neoplasms	hsa-mir-432	0.198414
Carcinoma Hepatocellular	hsa-mir-1286	0.198053
Stomach Neoplasms	hsa-mir-491	0.198041
Melanoma	hsa-mir-24	0.197778
Lupus Vulgaris	hsa-mir-19a	0.197699
Carcinoma Hepatocellular	hsa-mir-376b	0.19764
Breast Neoplasms	hsa-mir-433	0.197468
Glioma	hsa-mir-1	0.197406
Prostatic Neoplasms	hsa-mir-142	0.197322
Glioblastoma	hsa-mir-196a	0.197181
Carcinoma Hepatocellular	hsa-mir-1287	0.197167
Carcinoma Hepatocellular	hsa-mir-641	0.197167
Endometriosis	hsa-mir-29a	0.196738
Carcinoma Renal Cell	hsa-mir-125a	0.196386
Carcinoma Non-Small-Cell Lung	hsa-mir-92a	0.196227
Medulloblastoma	hsa-mir-221	0.195633
Colorectal Neoplasms	hsa-mir-30e	0.195629
Carcinoma Non-Small-Cell Lung	hsa-mir-30b	0.195536
Carcinoma Renal Cell	hsa-mir-182	0.195516
Heart Failure	hsa-mir-101	0.19476
Breast Neoplasms	hsa-mir-370	0.194579
Thyroid Neoplasms	hsa-mir-17	0.194243
Colorectal Neoplasms	hsa-mir-184	0.194125
Medulloblastoma	hsa-mir-199a	0.193875
Ovarian Neoplasms	hsa-mir-373	0.193615
Glioma	hsa-let-7a	0.193476
Medulloblastoma	hsa-mir-16	0.193469
Prostatic Neoplasms	hsa-mir-429	0.193061
Carcinoma Squamous Cell	hsa-let-7a	0.192876
Precursor Cell Lymphoblastic Leukemia-Lymphoma	hsa-mir-21	0.192758
Colorectal Neoplasms	hsa-let-7g	0.192359
Breast Neoplasms	hsa-mir-198	0.192309
Glioblastoma	hsa-mir-30b	0.1923
Prostatic Neoplasms	hsa-mir-9	0.19213
Head and Neck Neoplasms	hsa-mir-29a	0.191913
Stomach Neoplasms	hsa-mir-525	0.191454
Esophageal Neoplasms	hsa-mir-221	0.191298
Esophageal Neoplasms	hsa-mir-16	0.190463
Melanoma	hsa-mir-133b	0.190221
Adenoviridae Infections	hsa-mir-19a	0.190074
Stomach Neoplasms	hsa-mir-362	0.189817
Glioblastoma	hsa-mir-223	0.189774
Prostatic Neoplasms	hsa-let-7e	0.189678
Melanoma	hsa-mir-184	0.189644
Prostatic Neoplasms	hsa-mir-125a	0.189636
Stomach Neoplasms	hsa-mir-548b	0.189573
Breast Neoplasms	hsa-mir-371a	0.189167
Breast Neoplasms	hsa-mir-485	0.18867
Adenoviridae Infections	hsa-mir-1	0.188539
Thyroid Neoplasms	hsa-mir-34a	0.188372
Ovarian Neoplasms	hsa-mir-132	0.188363
Colorectal Neoplasms	hsa-mir-23b	0.188198
Colonic Neoplasms	hsa-mir-199a	0.188136
Parkinson Disease	hsa-mir-21	0.188128
Heart Failure	hsa-mir-517a	0.18783
Heart Failure	hsa-mir-106a	0.186748
Heart Failure	hsa-mir-203	0.186728
Breast Neoplasms	hsa-mir-363	0.186716
Neoplasms	hsa-mir-146b	0.186451
Breast Neoplasms	hsa-mir-323a	0.186046
Prostatic Neoplasms	hsa-mir-206	0.185995
Salivary Gland Neoplasms	hsa-mir-155	0.185496
Medulloblastoma	hsa-mir-133a	0.185458
Carcinoma Hepatocellular	hsa-mir-128	0.185169
Prostatic Neoplasms	hsa-let-7f	0.184739
Carcinoma Non-Small-Cell Lung	hsa-mir-26a	0.184215
Adenoviridae Infections	hsa-let-7a	0.184149
Prostatic Neoplasms	hsa-let-7i	0.184136
Carcinoma Renal Cell	hsa-mir-373	0.184116
Carcinoma Hepatocellular	hsa-mir-298	0.183954
Breast Neoplasms	hsa-mir-92b	0.183759
Urinary Bladder Neoplasms	hsa-let-7a	0.183726
Thyroid Neoplasms	hsa-mir-29a	0.183607
Lung Neoplasms	hsa-mir-372	0.183392
Stomach Neoplasms	hsa-mir-320c	0.18288
Lupus Vulgaris	hsa-mir-106b	0.182423
Stomach Neoplasms	hsa-mir-28	0.182306
Neoplasms	hsa-mir-212	0.181511
Carcinoma Renal Cell	hsa-mir-132	0.181438
Stomach Neoplasms	hsa-mir-571	0.181067
Stomach Neoplasms	hsa-mir-197	0.180939
Ovarian Neoplasms	hsa-mir-205	0.180891
Colorectal Neoplasms	hsa-mir-20b	0.180708
Colonic Neoplasms	hsa-mir-133a	0.180684
Melanoma	hsa-mir-181b	0.180407
Glioblastoma	hsa-let-7b	0.180268
Colorectal Neoplasms	hsa-mir-208b	0.180153
Adrenocortical Carcinoma	hsa-mir-34a	0.179732
Colorectal Neoplasms	hsa-mir-503	0.179318
Heart Failure	hsa-mir-25	0.179184
Head and Neck Neoplasms	hsa-mir-20a	0.17912
Colorectal Neoplasms	hsa-mir-204	0.179057
Breast Neoplasms	hsa-mir-1224	0.17894
Melanoma	hsa-mir-224	0.17875
Carcinoma Hepatocellular	hsa-mir-410	0.178514
Osteosarcoma	hsa-mir-155	0.178354
Colorectal Neoplasms	hsa-mir-134	0.178309
Endometrial Neoplasms	hsa-mir-17	0.178244
Breast Neoplasms	hsa-mir-99a	0.177947
Carcinoma Hepatocellular	hsa-mir-506	0.177877
Ovarian Neoplasms	hsa-mir-212	0.177605
Lung Neoplasms	hsa-mir-184	0.17754
Carcinoma	hsa-mir-146a	0.177164
Ovarian Neoplasms	hsa-mir-23a	0.177093
Carcinoma Non-Small-Cell Lung	hsa-let-7c	0.176696
Carcinoma Squamous Cell	hsa-mir-200b	0.176286
Lupus Vulgaris	hsa-mir-222	0.176021
Melanoma	hsa-mir-208b	0.175788
Breast Neoplasms	hsa-mir-509	0.175682
Glioma	hsa-mir-92a	0.17565
Melanoma	hsa-mir-503	0.175571
Stomach Neoplasms	hsa-mir-326	0.175344
Adrenocortical Carcinoma	hsa-mir-29a	0.17529
Urinary Bladder Neoplasms	hsa-mir-106b	0.175288
Heart Failure	hsa-mir-184	0.175269
Endometriosis	hsa-mir-19b	0.175225
Melanoma	hsa-mir-199b	0.17522
Heart Failure	hsa-mir-183	0.175103
Stomach Neoplasms	hsa-mir-663a	0.174982
Colorectal Neoplasms	hsa-mir-494	0.174881
Glioblastoma	hsa-let-7c	0.174255
Esophageal Neoplasms	hsa-mir-18a	0.174248
Endometriosis	hsa-mir-29b	0.174243
Lupus Vulgaris	hsa-mir-200b	0.174187
Breast Neoplasms	hsa-mir-196b	0.173622
Melanoma	hsa-mir-519d	0.173591
Ovarian Neoplasms	hsa-mir-106a	0.173349
Carcinoma Hepatocellular	hsa-mir-382	0.173299
Carcinoma Squamous Cell	hsa-mir-30b	0.173275
Stomach Neoplasms	hsa-mir-323a	0.173112
Glioma	hsa-mir-30b	0.173074
Carcinoma Squamous Cell	hsa-mir-196a	0.172929
Pituitary Neoplasms	hsa-mir-155	0.172668
Lupus Vulgaris	hsa-mir-30b	0.172609
Melanoma	hsa-mir-483	0.172474
Heart Failure	hsa-let-7g	0.172437
Heart Failure	hsa-mir-7	0.172346
Heart Failure	hsa-mir-323a	0.172307
Pancreatic Neoplasms	hsa-mir-181a	0.171824
Breast Neoplasms	hsa-mir-574	0.171812
Melanoma	hsa-mir-494	0.17181
Carcinoma Hepatocellular	hsa-mir-513a	0.17145
Carcinoma Renal Cell	hsa-mir-212	0.171416
Breast Neoplasms	hsa-mir-376b	0.171384
Lupus Vulgaris	hsa-mir-92a	0.171137
Ovarian Neoplasms	hsa-mir-203	0.171134
Leukemia	hsa-mir-155	0.171084
Adenoviridae Infections	hsa-mir-106b	0.170983
Mouth Neoplasms	hsa-mir-155	0.17096
Lupus Vulgaris	hsa-mir-196a	0.170957
Adenoviridae Infections	hsa-mir-222	0.170845
Pancreatic Neoplasms	hsa-mir-29c	0.170786
Glioma	hsa-mir-223	0.170754
Head and Neck Neoplasms	hsa-mir-29b	0.170739
Breast Neoplasms	hsa-mir-95	0.170686
Carcinoma Renal Cell	hsa-mir-23a	0.170646
Endometrial Neoplasms	hsa-mir-34a	0.170571
Ovarian Neoplasms	hsa-mir-372	0.17036
Adenocarcinoma	hsa-mir-34a	0.170272
Glioblastoma	hsa-mir-214	0.17024
Lung Neoplasms	hsa-mir-23b	0.170006
Stomach Neoplasms	hsa-mir-198	0.169634
Stomach Neoplasms	hsa-mir-485	0.16935
Head and Neck Neoplasms	hsa-mir-19b	0.169254
Breast Neoplasms	hsa-mir-98	0.169128
Breast Neoplasms	hsa-mir-99b	0.169
Stomach Neoplasms	hsa-mir-499a	0.168745
Multiple Myeloma	hsa-mir-155	0.168637
Neoplasms	hsa-mir-23a	0.168611
Breast Neoplasms	hsa-mir-637	0.168597
Endometrial Neoplasms	hsa-mir-29a	0.168572
Carcinoma Hepatocellular	hsa-mir-548b	0.168338
Carcinoma Hepatocellular	hsa-mir-149	0.168087
Thyroid Neoplasms	hsa-mir-20a	0.16808
Carcinoma Hepatocellular	hsa-mir-302d	0.16804
Glioma	hsa-mir-15a	0.167925
Carcinoma Non-Small-Cell Lung	hsa-mir-200a	0.167829
Uterine Cervical Neoplasms	hsa-mir-29a	0.167593
Hepatitis B	hsa-mir-155	0.167353
Medulloblastoma	hsa-mir-1	0.167287
Carcinoma Renal Cell	hsa-mir-106a	0.167247
Glioblastoma	hsa-mir-200a	0.167007
Ovarian Neoplasms	hsa-mir-24	0.166888
Heart Failure	hsa-mir-20b	0.166447
Ovarian Neoplasms	hsa-mir-32	0.166419
Stomach Neoplasms	hsa-mir-339	0.166315
Endometriosis	hsa-mir-221	0.166157
Adenocarcinoma	hsa-mir-29a	0.166
Pancreatic Neoplasms	hsa-mir-141	0.165982
Melanoma	hsa-mir-140	0.165646
Glioma	hsa-mir-210	0.165302
Melanoma	hsa-mir-335	0.165285
Neoplasms	hsa-mir-203	0.165089
Endometriosis	hsa-mir-16	0.16506
Urinary Bladder Neoplasms	hsa-mir-30b	0.164976
Adenoviridae Infections	hsa-mir-200b	0.164875
Colorectal Neoplasms	hsa-mir-424	0.164705
Prostatic Neoplasms	hsa-mir-212	0.164687
Carcinoma Squamous Cell	hsa-mir-26a	0.164666
Glioma	hsa-mir-26a	0.164654
Carcinoma Renal Cell	hsa-mir-30a	0.164586
Lupus Vulgaris	hsa-mir-15a	0.164542
Breast Neoplasms	hsa-mir-144	0.164511
Heart Failure	hsa-mir-181b	0.164478
Adenoviridae Infections	hsa-mir-196a	0.164383
Glioblastoma	hsa-mir-150	0.164351
Esophageal Neoplasms	hsa-mir-1	0.164
Medulloblastoma	hsa-let-7a	0.163858
Carcinoma Hepatocellular	hsa-mir-383	0.16385
Prostatic Neoplasms	hsa-mir-23a	0.163791
Myotonic Dystrophy	hsa-mir-21	0.163785
Asthma	hsa-mir-21	0.163702
Carcinoma Renal Cell	hsa-mir-32	0.163635
Stomach Neoplasms	hsa-mir-92b	0.163618
Ovarian Neoplasms	hsa-mir-184	0.163488
Lupus Vulgaris	hsa-mir-26a	0.163413
Lung Neoplasms	hsa-mir-20b	0.16328
Stomach Neoplasms	hsa-mir-324	0.163263
Melanoma	hsa-mir-148b	0.163231
Prostatic Neoplasms	hsa-mir-372	0.163007
Thyroid Neoplasms	hsa-mir-29b	0.162971
Leukemia Myeloid Acute	hsa-mir-16	0.162835
Muscular Disorders Atrophic	hsa-mir-17	0.162788
Melanoma	hsa-mir-424	0.162687
Melanoma	hsa-mir-30c	0.162627
Melanoma	hsa-mir-208a	0.162618
Colorectal Neoplasms	hsa-mir-181c	0.162565
Adenoviridae Infections	hsa-mir-223	0.162512
Glioblastoma	hsa-mir-34c	0.162467
Heart Failure	hsa-mir-134	0.162408
Lung Neoplasms	hsa-mir-208b	0.162372
Colorectal Neoplasms	hsa-mir-30c	0.162329
Urinary Bladder Neoplasms	hsa-mir-223	0.162324
Glioma	hsa-let-7b	0.162322
Lung Neoplasms	hsa-mir-204	0.162212
Melanoma	hsa-mir-181c	0.162071
Heart Failure	hsa-mir-224	0.161974
Carcinoma Renal Cell	hsa-mir-372	0.161951
Lupus Vulgaris	hsa-let-7b	0.161845
Stomach Neoplasms	hsa-mir-432	0.161565
Thyroid Neoplasms	hsa-mir-145	0.161538
Head and Neck Neoplasms	hsa-mir-16	0.161505
Neoplasms	hsa-mir-32	0.161491
Pancreatic Neoplasms	hsa-mir-195	0.161427
Adenoviridae Infections	hsa-mir-26a	0.161369
Stomach Neoplasms	hsa-mir-509	0.161357
Lung Neoplasms	hsa-mir-503	0.16128
Adrenocortical Carcinoma	hsa-mir-20a	0.16122
Carcinoma Squamous Cell	hsa-let-7b	0.161139
Atrial Fibrillation	hsa-mir-21	0.160849
Leukemia Myeloid Acute	hsa-mir-199a	0.16077
Heart Failure	hsa-mir-503	0.160589
Head and Neck Neoplasms	hsa-mir-199a	0.160497
Melanoma	hsa-mir-301a	0.160341
Carcinoma Non-Small-Cell Lung	hsa-mir-192	0.160247
Carcinoma Hepatocellular	hsa-mir-488	0.160186
Carcinoma Hepatocellular	hsa-mir-539	0.160073
Carcinoma Hepatocellular	hsa-mir-376c	0.159911
Carcinoma Renal Cell	hsa-mir-24	0.159732
Carcinoma Hepatocellular	hsa-mir-215	0.15973
Stomach Neoplasms	hsa-mir-153	0.159628
Carcinoma Hepatocellular	hsa-mir-708	0.159626
Heart Failure	hsa-mir-208b	0.159303
Thyroid Neoplasms	hsa-mir-19b	0.15919
Heart Failure	hsa-mir-31	0.159122
Carcinoma Non-Small-Cell Lung	hsa-mir-141	0.159003
Glioblastoma	hsa-mir-192	0.158982
Prostatic Neoplasms	hsa-mir-30a	0.158956
Endometriosis	hsa-mir-133a	0.158743
Pancreatic Neoplasms	hsa-mir-9	0.158647
Heart Failure	hsa-mir-219	0.158513
Stomach Neoplasms	hsa-mir-1224	0.158458
Stomach Neoplasms	hsa-mir-99a	0.15837
Carcinoma Renal Cell	hsa-mir-25	0.158184
Heart Failure	hsa-mir-483	0.158072
Glioblastoma	hsa-mir-200c	0.157979
Ovarian Neoplasms	hsa-mir-7	0.157732
Glioblastoma	hsa-mir-141	0.157727
Colorectal Neoplasms	hsa-mir-302a	0.15748
Lung Neoplasms	hsa-mir-483	0.157418
Adenoviridae Infections	hsa-mir-15a	0.157406
Stomach Neoplasms	hsa-mir-96	0.157297
Melanoma	hsa-mir-134	0.157241
Glioblastoma	hsa-mir-15b	0.15709
Glioma	hsa-let-7c	0.156886
Stomach Neoplasms	hsa-mir-367	0.156545
Carcinoma Hepatocellular	hsa-mir-571	0.156544
Carcinoma Squamous Cell	hsa-let-7c	0.156524
Adrenocortical Carcinoma	hsa-mir-29b	0.156396
Melanoma	hsa-mir-130a	0.156371
Carcinoma	hsa-mir-17	0.156305
Breast Neoplasms	hsa-mir-1286	0.156226
Breast Neoplasms	hsa-mir-490	0.156102
Leukemia Myeloid Acute	hsa-mir-133a	0.155987
Urinary Bladder Neoplasms	hsa-mir-26a	0.15598
Carcinoma Basal Cell	hsa-mir-146a	0.155826
Neoplasms	hsa-mir-184	0.155789
Adenoviridae Infections	hsa-let-7b	0.155645
Carcinoma Non-Small-Cell Lung	hsa-mir-142	0.155422
Pancreatic Neoplasms	hsa-mir-125a	0.1553
Carcinoma Renal Cell	hsa-mir-30e	0.155278
Lupus Vulgaris	hsa-let-7c	0.155268
Melanoma	hsa-mir-491	0.155238
Ovarian Neoplasms	hsa-mir-23b	0.155137
Medulloblastoma	hsa-mir-106b	0.155129
Stomach Neoplasms	hsa-mir-10a	0.154795
Carcinoma Non-Small-Cell Lung	hsa-mir-195	0.15472
Urinary Bladder Neoplasms	hsa-let-7b	0.154573
Prostatic Neoplasms	hsa-mir-24	0.15452
Carcinoma Non-Small-Cell Lung	hsa-mir-122	0.154475
Breast Neoplasms	hsa-mir-1287	0.154369
Breast Neoplasms	hsa-mir-641	0.154369
Endometrial Neoplasms	hsa-mir-20a	0.154336
Breast Neoplasms	hsa-mir-130b	0.154233
Carcinoma Renal Cell	hsa-mir-183	0.154129
Carcinoma Hepatocellular	hsa-mir-188	0.154123
Pancreatic Neoplasms	hsa-mir-206	0.154058
Thyroid Neoplasms	hsa-mir-16	0.154026
Muscular Disorders Atrophic	hsa-mir-29a	0.153826
Neoplasms	hsa-mir-183	0.15365
Eosinophilic Esophagitis	hsa-mir-155	0.15356
Stomach Neoplasms	hsa-mir-376b	0.153462
Prolactinoma	hsa-mir-21	0.153327
Glioblastoma	hsa-mir-34b	0.153308
Carcinoma Renal Cell	hsa-mir-133b	0.153095
Neoplasms	hsa-mir-133b	0.152909
Thyroid Neoplasms	hsa-mir-199a	0.152771
Adenocarcinoma	hsa-mir-125b	0.152689
Glioblastoma	hsa-mir-122	0.152626
Stomach Neoplasms	hsa-mir-637	0.152431
Adrenocortical Carcinoma	hsa-mir-19b	0.152401
Barrett Esophagus	hsa-mir-155	0.152245
Carcinoma Non-Small-Cell Lung	hsa-mir-373	0.152174
Rectal Neoplasms	hsa-mir-146a	0.151967
Ovarian Neoplasms	hsa-mir-181b	0.151891
Endometriosis	hsa-mir-18a	0.151884
Lupus Vulgaris	hsa-mir-214	0.151731
Esophageal Neoplasms	hsa-mir-106b	0.151618
Stomach Neoplasms	hsa-mir-325	0.151395
Glioblastoma	hsa-mir-429	0.15116
Pancreatic Neoplasms	hsa-mir-93	0.151037
Breast Neoplasms	hsa-mir-217	0.150943
Carcinoma Non-Small-Cell Lung	hsa-let-7e	0.150927
Glioblastoma	hsa-mir-125a	0.150868
Melanoma	hsa-mir-10b	0.150636
Carcinoma Hepatocellular	hsa-mir-211	0.15054
Breast Neoplasms	hsa-mir-498	0.150514
Heart Failure	hsa-mir-335	0.150336
Medulloblastoma	hsa-mir-222	0.150318
Prostatic Neoplasms	hsa-mir-184	0.150309
Glioma	hsa-mir-200a	0.150298
Gout	hsa-mir-21	0.150008
Stomach Neoplasms	hsa-mir-922	0.149994
Carcinoma Non-Small-Cell Lung	hsa-mir-132	0.149933
Adenoviridae Infections	hsa-let-7c	0.149744
Head and Neck Neoplasms	hsa-mir-126	0.149706
Stomach Neoplasms	hsa-mir-99b	0.149689
Glioblastoma	hsa-let-7e	0.149644
Carcinoma Squamous Cell	hsa-mir-200a	0.149604
Prostatic Neoplasms	hsa-mir-30e	0.149586
Endometrial Neoplasms	hsa-mir-29b	0.149293
Medulloblastoma	hsa-mir-200b	0.149293
Carcinoma Hepatocellular	hsa-mir-519b	0.149258
Colorectal Neoplasms	hsa-mir-302b	0.149218
Breast Neoplasms	hsa-mir-325	0.149105
Urinary Bladder Neoplasms	hsa-let-7c	0.149066
Breast Neoplasms	hsa-mir-449b	0.149056
Stomach Neoplasms	hsa-mir-98	0.148969
Carcinoma Hepatocellular	hsa-mir-510	0.148859
Adrenocortical Carcinoma	hsa-mir-199a	0.148712
Breast Neoplasms	hsa-mir-410	0.148608
Lymphoma	hsa-mir-34a	0.148597
Ovarian Neoplasms	hsa-mir-208b	0.148584
Uterine Cervical Neoplasms	hsa-mir-29b	0.14854
Breast Neoplasms	hsa-mir-381	0.148521
Neoplasms	hsa-mir-23b	0.148481
Esophageal Neoplasms	hsa-mir-200b	0.148397
Glioblastoma	hsa-mir-182	0.148392
Azoospermia	hsa-mir-155	0.148332
Lupus Vulgaris	hsa-mir-200a	0.148269
Ovarian Neoplasms	hsa-mir-503	0.148198
Adrenocortical Carcinoma	hsa-mir-221	0.148116
Heart Failure	hsa-mir-301a	0.148025
Ovarian Neoplasms	hsa-mir-204	0.147933
Lung Neoplasms	hsa-mir-424	0.1479
Carcinoma Renal Cell	hsa-mir-181b	0.147764
Adenoviridae Infections	hsa-mir-34c	0.147725
Carcinoma Non-Small-Cell Lung	hsa-let-7f	0.147679
Carcinoma Hepatocellular	hsa-mir-154	0.147657
Endometrial Neoplasms	hsa-mir-145	0.147644
Glioma	hsa-mir-150	0.147573
Heart Failure	hsa-mir-140	0.147489
Lung Neoplasms	hsa-mir-208a	0.147485
Colorectal Neoplasms	hsa-mir-100	0.147437
Heart Failure	hsa-mir-181c	0.147387
Adenocarcinoma	hsa-mir-29b	0.147144
Carcinoma Non-Small-Cell Lung	hsa-let-7i	0.147118
Carcinoma Squamous Cell	hsa-mir-150	0.147104
Medulloblastoma	hsa-mir-30b	0.147023
Breast Neoplasms	hsa-mir-382	0.14688
Esophageal Neoplasms	hsa-mir-222	0.146802
Carcinoma	hsa-mir-29a	0.146696
Prostatic Neoplasms	hsa-let-7g	0.146628
Muscular Disorders Atrophic	hsa-mir-125b	0.146617
Carcinoma Non-Small-Cell Lung	hsa-mir-206	0.146596
Thyroid Neoplasms	hsa-mir-133a	0.146576
Medulloblastoma	hsa-mir-196a	0.146474
Endometriosis	hsa-mir-19a	0.146451
Ovarian Neoplasms	hsa-mir-199b	0.146393
Lupus Vulgaris	hsa-mir-29c	0.146343
Glioblastoma	hsa-let-7f	0.146204
Lung Neoplasms	hsa-mir-148b	0.14611
Heart Failure	hsa-mir-27b	0.145937
Glioma	hsa-mir-29c	0.14593
Glioblastoma	hsa-let-7i	0.1459
Heart Failure	hsa-mir-148b	0.145847
Stomach Neoplasms	hsa-mir-30d	0.145818
Prostatic Neoplasms	hsa-mir-7	0.145709
Endometrial Neoplasms	hsa-mir-19b	0.145688
Melanoma	hsa-mir-100	0.145649
Urinary Bladder Neoplasms	hsa-mir-214	0.145623
Stomach Neoplasms	hsa-mir-144	0.145617
Lymphoma	hsa-mir-29a	0.145598
Pancreatic Neoplasms	hsa-mir-373	0.145469
Lung Neoplasms	hsa-mir-130a	0.145422
Colonic Neoplasms	hsa-mir-222	0.145421
Carcinoma Hepatocellular	hsa-mir-325	0.145295
Ovarian Neoplasms	hsa-mir-494	0.144986
Carcinoma Hepatocellular	hsa-mir-431	0.144631
Stomach Neoplasms	hsa-mir-423	0.144626
Adenoviridae Infections	hsa-mir-214	0.144592
Carcinoma Renal Cell	hsa-mir-20b	0.144583
Glioma	hsa-mir-34c	0.144568
Glioblastoma	hsa-mir-93	0.144559
Ovarian Neoplasms	hsa-mir-483	0.144513
Stomach Neoplasms	hsa-mir-548c	0.144401
Lupus Vulgaris	hsa-mir-181a	0.14415
Adenoviridae Infections	hsa-mir-181a	0.144103
Carcinoma Renal Cell	hsa-mir-208b	0.143916
Carcinoma Squamous Cell	hsa-mir-192	0.143862
Neoplasms	hsa-mir-208b	0.143681
Glioma	hsa-mir-192	0.143474
Adenocarcinoma	hsa-mir-19b	0.143186
Heart Failure	hsa-mir-328	0.1431
Lupus Vulgaris	hsa-mir-34c	0.142978
Colonic Neoplasms	hsa-mir-30b	0.142887
Melanoma	hsa-mir-28	0.142848
Glioblastoma	hsa-mir-27a	0.142773
Colorectal Neoplasms	hsa-mir-320c	0.14267
Neoplasms Squamous Cell	hsa-mir-146a	0.142668
Breast Neoplasms	hsa-mir-378a	0.142587
Colorectal Neoplasms	hsa-mir-326	0.142473
Carcinoma Renal Cell	hsa-mir-503	0.142462
Head and Neck Neoplasms	hsa-mir-19a	0.142351
Colorectal Neoplasms	hsa-mir-193b	0.142256
Adenoviridae Infections	hsa-mir-29c	0.142207
Glioma	hsa-mir-141	0.142197
Colonic Neoplasms	hsa-mir-196a	0.142163
Colorectal Neoplasms	hsa-mir-197	0.14207
Lung Neoplasms	hsa-mir-491	0.141952
Heart Failure	hsa-mir-491	0.141945
Carcinoma Hepatocellular	hsa-mir-638	0.141849
Medulloblastoma	hsa-mir-15a	0.141845
Nasopharyngeal Neoplasms	hsa-mir-34a	0.141798
Lung Neoplasms	hsa-mir-302a	0.141703
Adenoviridae Infections	hsa-mir-200a	0.141655
Colorectal Neoplasms	hsa-mir-663a	0.141652
Glioma	hsa-mir-200c	0.141617
Breast Neoplasms	hsa-mir-765	0.141615
Carcinoma Renal Cell	hsa-mir-31	0.141604
Breast Neoplasms	hsa-mir-484	0.141429
Endometrial Neoplasms	hsa-mir-221	0.141401
Heart Failure	hsa-mir-124	0.141396
Melanoma	hsa-mir-197	0.141343
Carcinoma Squamous Cell	hsa-mir-141	0.14134
Neoplasms	hsa-mir-503	0.141231
Medulloblastoma	hsa-mir-210	0.141102
Lupus Vulgaris	hsa-mir-192	0.141089
Heart Failure	hsa-mir-486	0.141063
Muscular Disorders Atrophic	hsa-mir-20a	0.140913
Ovarian Neoplasms	hsa-mir-107	0.140833
Carcinoma Hepatocellular	hsa-mir-519c	0.140798
Carcinoma Hepatocellular	hsa-mir-874	0.14069
Endometrial Neoplasms	hsa-mir-16	0.140448
Urinary Bladder Neoplasms	hsa-mir-150	0.14035
Glioma	hsa-mir-142	0.140337
Carcinoma Squamous Cell	hsa-mir-15b	0.140319
Leukemia Myeloid Acute	hsa-mir-1	0.140183
Melanoma	hsa-mir-525	0.139997
Colorectal Neoplasms	hsa-mir-433	0.139947
Glioblastoma	hsa-mir-373	0.139921
Colorectal Neoplasms	hsa-mir-302c	0.139891
Prostatic Neoplasms	hsa-mir-20b	0.139886
Adenocarcinoma	hsa-mir-199a	0.139854
Stomach Neoplasms	hsa-mir-490	0.139731
Uterine Cervical Neoplasms	hsa-mir-199a	0.139618
Melanoma	hsa-mir-320c	0.139518
Medulloblastoma	hsa-mir-26a	0.139391
Neoplasms	hsa-mir-219	0.139376
Thyroid Neoplasms	hsa-mir-18a	0.139317
Lupus Vulgaris	hsa-mir-141	0.139274
Colorectal Neoplasms	hsa-mir-370	0.139246
Endometrial Neoplasms	hsa-mir-199a	0.139216
Heart Failure	hsa-mir-137	0.139144
Melanoma	hsa-mir-326	0.139133
Carcinoma Renal Cell	hsa-mir-494	0.138987
Carcinoma Hepatocellular	hsa-mir-520h	0.138887
Lung Neoplasms	hsa-mir-342	0.138843
Carcinoma Renal Cell	hsa-mir-483	0.138748
Neoplasms	hsa-mir-483	0.138704
Breast Neoplasms	hsa-mir-492	0.138588
Lupus Vulgaris	hsa-mir-148a	0.13856
Neoplasms	hsa-mir-494	0.138546
Stomach Neoplasms	hsa-mir-338	0.138506
Prostatic Neoplasms	hsa-mir-134	0.138294
Prostatic Neoplasms	hsa-mir-208b	0.138266
Urinary Bladder Neoplasms	hsa-mir-181a	0.138265
Glioma	hsa-mir-148a	0.138224
Pancreatic Neoplasms	hsa-mir-205	0.138183
Adenoviridae Infections	hsa-mir-122	0.138099
Breast Neoplasms	hsa-mir-181d	0.138071
Melanoma	hsa-mir-26b	0.138043
Musculoskeletal Abnormalities	hsa-mir-21	0.138028
Melanoma	hsa-mir-129	0.137941
Pulmonary Disease Chronic Obstructive	hsa-mir-21	0.137932
Hematologic Neoplasms	hsa-mir-21	0.137923
Lymphoma Large-Cell Anaplastic	hsa-mir-21	0.137826
Huntington Disease	hsa-mir-21	0.137786
Ovarian Neoplasms	hsa-mir-424	0.137775
Nasopharyngeal Neoplasms	hsa-mir-29a	0.137754
Lung Neoplasms	hsa-mir-328	0.137704
Lung Neoplasms	hsa-mir-362	0.137688
Leukemia B-Cell	hsa-mir-21	0.137657
Medulloblastoma	hsa-let-7b	0.137623
Carcinoma Squamous Cell	hsa-mir-122	0.13752
Colonic Neoplasms	hsa-mir-210	0.137445
Melanoma	hsa-mir-663a	0.137419
Melanoma	hsa-mir-370	0.137285
Lymphoma Primary Effusion	hsa-mir-21	0.137268
Lupus Vulgaris	hsa-mir-15b	0.137225
Prostatic Neoplasms	hsa-mir-503	0.137202
Colorectal Neoplasms	hsa-mir-198	0.136957
Muscular Disorders Atrophic	hsa-mir-29b	0.136909
Glioblastoma	hsa-mir-132	0.136837
Melanoma	hsa-mir-433	0.136733
Glioma	hsa-mir-122	0.136675
Carcinoma Hepatocellular	hsa-mir-675	0.136602
Carcinoma Hepatocellular	hsa-mir-520c	0.136593
Carcinoma Hepatocellular	hsa-mir-584	0.136576
Stomach Neoplasms	hsa-mir-298	0.136539
Prostatic Neoplasms	hsa-mir-199b	0.13641
Parkinson Disease	hsa-mir-155	0.13639
Ovarian Neoplasms	hsa-mir-134	0.136311
Carcinoma Renal Cell	hsa-mir-107	0.136311
Carcinoma Hepatocellular	hsa-mir-135b	0.136238
Sarcoma Kaposi	hsa-mir-21	0.136225
Glioma	hsa-mir-429	0.136154
Glioma	hsa-mir-34b	0.136011
Schizophrenia	hsa-mir-146a	0.135736
Prostatic Neoplasms	hsa-mir-219	0.13565
Glioma	hsa-let-7d	0.13563
Adenoviridae Infections	hsa-mir-192	0.135462
Lymphoma	hsa-mir-125b	0.135363
Colonic Neoplasms	hsa-mir-26a	0.135362
Endometrial Neoplasms	hsa-mir-133a	0.135307
Ovarian Neoplasms	hsa-mir-27b	0.135275
Carcinoma Squamous Cell	hsa-mir-429	0.135224
Melanoma	hsa-mir-198	0.135172
Ovarian Neoplasms	hsa-mir-181c	0.135054
Heart Failure	hsa-mir-362	0.13502
Ovarian Neoplasms	hsa-mir-208a	0.134942
Melanoma	hsa-mir-324	0.134894
Heart Failure	hsa-mir-320c	0.134867
Ovarian Neoplasms	hsa-mir-301a	0.13486
Carcinoma Hepatocellular	hsa-mir-384	0.134841
Stomach Neoplasms	hsa-mir-1290	0.134601
Uterine Cervical Neoplasms	hsa-mir-133a	0.13455
Colorectal Neoplasms	hsa-mir-371a	0.134537
Lung Neoplasms	hsa-mir-320a	0.134423
Lung Neoplasms	hsa-mir-302b	0.134419
Prostatic Neoplasms	hsa-mir-483	0.134392
Lupus Vulgaris	hsa-let-7d	0.134324
Melanoma	hsa-mir-127	0.134295
Lupus Vulgaris	hsa-mir-122	0.134258
Stomach Neoplasms	hsa-mir-320d	0.134249
Colorectal Neoplasms	hsa-mir-363	0.134152
Lupus Vulgaris	hsa-mir-9	0.134095
Prostatic Neoplasms	hsa-mir-494	0.134071
Glioma	hsa-let-7e	0.134049
Neoplasms	hsa-mir-107	0.134045
Melanoma	hsa-mir-485	0.133954
Thyroid Neoplasms	hsa-mir-19a	0.133932
Adenoviridae Infections	hsa-mir-34b	0.133851
Lupus Vulgaris	hsa-mir-34b	0.133824
Stomach Neoplasms	hsa-mir-217	0.133814
Heart Failure	hsa-mir-100	0.133643
Adrenocortical Carcinoma	hsa-mir-18a	0.133641
Colorectal Neoplasms	hsa-mir-629	0.133574
Carcinoma Squamous Cell	hsa-let-7e	0.133532
Adenoviridae Infections	hsa-mir-200c	0.133498
Liver Neoplasms	hsa-mir-155	0.133433
Rectal Neoplasms	hsa-mir-17	0.1333
Lupus Vulgaris	hsa-mir-429	0.133261
Melanoma	hsa-mir-363	0.133187
Carcinoma Renal Cell	hsa-mir-181c	0.133119
Medulloblastoma	hsa-let-7c	0.133093
Urinary Bladder Neoplasms	hsa-mir-148a	0.133041
Precursor Cell Lymphoblastic Leukemia-Lymphoma	hsa-mir-155	0.132886
Stomach Neoplasms	hsa-mir-410	0.132794
Cardiomyopathy Hypertrophic	hsa-mir-155	0.132784
Adenoviridae Infections	hsa-mir-141	0.132717
Carcinoma Renal Cell	hsa-mir-140	0.132709
Diabetes Mellitus Type 2	hsa-mir-155	0.132669
Breast Neoplasms	hsa-mir-188	0.132667
Carcinoma Squamous Cell	hsa-mir-206	0.132637
Pancreatic Neoplasms	hsa-mir-30a	0.132616
Melanoma	hsa-mir-451a	0.1325
Breast Neoplasms	hsa-mir-519b	0.13247
Hypertrophy	hsa-mir-146a	0.132437
Glioma	hsa-mir-125a	0.132299
Melanoma	hsa-mir-629	0.132294
Carcinoma Renal Cell	hsa-mir-424	0.132288
Lupus Vulgaris	hsa-mir-125a	0.132227
Stomach Neoplasms	hsa-mir-382	0.132188
Colorectal Neoplasms	hsa-mir-485	0.132164
Lupus Vulgaris	hsa-mir-143	0.132132
Mesothelioma	hsa-mir-146a	0.132126
Lupus Vulgaris	hsa-mir-206	0.132051
Melanoma	hsa-mir-499a	0.132036
Neuroblastoma	hsa-mir-146a	0.131568
Neoplasms	hsa-mir-134	0.131551
Carcinoma Hepatocellular	hsa-mir-628	0.131469
Stomach Neoplasms	hsa-mir-381	0.131435
Glioma	hsa-mir-206	0.131397
Melanoma	hsa-mir-371a	0.131378
Endometriosis	hsa-mir-106b	0.131223
Adenoviridae Infections	hsa-mir-9	0.131121
Heart Failure	hsa-mir-193b	0.131121
Carcinoma Squamous Cell	hsa-let-7f	0.131114
Glioma	hsa-let-7f	0.131049
Carcinoma Non-Small-Cell Lung	hsa-mir-372	0.131038
Ovarian Neoplasms	hsa-mir-124	0.131009
Colorectal Neoplasms	hsa-mir-432	0.130972
Neoplasms	hsa-mir-424	0.130928
Adenoviridae Infections	hsa-mir-195	0.1308
Glioma	hsa-let-7i	0.130776
Adenoviridae Infections	hsa-mir-142	0.130725
Carcinoma Hepatocellular	hsa-mir-374b	0.130688
Ovarian Neoplasms	hsa-mir-491	0.130596
Lupus Vulgaris	hsa-mir-182	0.130594
Carcinoma Renal Cell	hsa-mir-148b	0.130583
Lung Neoplasms	hsa-mir-28	0.130581
Melanoma	hsa-mir-520d	0.130482
Stomach Neoplasms	hsa-mir-506	0.130478
Carcinoma Renal Cell	hsa-mir-27b	0.130461
Retinoblastoma	hsa-mir-146a	0.130376
Lupus Vulgaris	hsa-let-7f	0.130339
Carcinoma Basal Cell	hsa-mir-34a	0.130283
Leukemia Myelogenous Chronic BCR-ABL Positive	hsa-mir-21	0.130279
Carcinoma	hsa-mir-29b	0.130269
Carcinoma Renal Cell	hsa-mir-208a	0.130128
Endometrial Neoplasms	hsa-mir-126	0.130022
Carcinoma Hepatocellular	hsa-mir-337	0.129981
Breast Neoplasms	hsa-mir-211	0.129966
Ovarian Neoplasms	hsa-mir-137	0.129916
Neoplasms	hsa-mir-140	0.129912
Urinary Bladder Neoplasms	hsa-mir-122	0.129881
Adenoviridae Infections	hsa-let-7d	0.129872
Adenoviridae Infections	hsa-let-7f	0.129869
Lung Neoplasms	hsa-mir-663a	0.12973
Muscular Disorders Atrophic	hsa-mir-16	0.12971
Carcinoma Non-Small-Cell Lung	hsa-mir-23a	0.129699
Lupus Vulgaris	hsa-let-7i	0.129645
Head and Neck Neoplasms	hsa-mir-106b	0.12962
Autistic Disorder	hsa-mir-17	0.129612
Carcinoma Renal Cell	hsa-mir-130a	0.129541
Breast Neoplasms	hsa-mir-539	0.129489
Glioblastoma	hsa-mir-23a	0.129482
Carcinoma Renal Cell	hsa-mir-301a	0.129476
Stomach Neoplasms	hsa-mir-498	0.129426
Lymphoma	hsa-mir-29b	0.129368
Lymphoma	hsa-mir-145	0.129272
Melanoma	hsa-mir-92b	0.129236
Adenoviridae Infections	hsa-mir-143	0.129212
Glioblastoma	hsa-mir-212	0.129141
Neoplasms	hsa-mir-27b	0.129126
Thyroid Neoplasms	hsa-let-7a	0.129095
Medulloblastoma	hsa-mir-214	0.128972
Lung Neoplasms	hsa-mir-370	0.128946
Neoplasms	hsa-mir-208a	0.128883
Neoplasms	hsa-mir-181c	0.128827
Carcinoma Renal Cell	hsa-mir-22	0.128736
Leukemia Myeloid Acute	hsa-mir-106b	0.128645
Neoplasms	hsa-mir-301a	0.128612
Carcinoma Squamous Cell	hsa-mir-93	0.12861
Prostatic Neoplasms	hsa-mir-140	0.128581
Adenoviridae Infections	hsa-let-7i	0.128562
Endometriosis	hsa-mir-222	0.128552
Heart Failure	hsa-mir-197	0.128476
Neoplasms	hsa-mir-148b	0.128463
Urinary Bladder Neoplasms	hsa-let-7d	0.128459
Melanoma	hsa-mir-323a	0.128366
Adrenocortical Carcinoma	hsa-mir-19a	0.128347
Pancreatic Neoplasms	hsa-mir-372	0.128334
Prostatic Neoplasms	hsa-mir-181c	0.12824
Urinary Bladder Neoplasms	hsa-mir-125a	0.12822
Ovarian Neoplasms	hsa-mir-362	0.128162
Carcinoma Hepatocellular	hsa-mir-216b	0.128112
Lung Neoplasms	hsa-mir-193b	0.127998
Breast Neoplasms	hsa-mir-154	0.127854
Adenoviridae Infections	hsa-mir-429	0.127799
Endometrial Neoplasms	hsa-mir-18a	0.127749
Endometriosis	hsa-mir-30b	0.127716
Uterine Cervical Neoplasms	hsa-mir-18a	0.127677
Nasopharyngeal Neoplasms	hsa-mir-125b	0.12765
Ovarian Neoplasms	hsa-mir-342	0.127632
Urinary Bladder Neoplasms	hsa-let-7e	0.127618
Carcinoma	hsa-mir-19b	0.12761
Carcinoma Hepatocellular	hsa-mir-520a	0.127501
Adenoviridae Infections	hsa-mir-15b	0.127445
Carcinoma Basal Cell	hsa-mir-29a	0.127438
Stomach Neoplasms	hsa-mir-383	0.127237
Medulloblastoma	hsa-mir-200a	0.127153
Carcinoma Squamous Cell	hsa-mir-146b	0.127083
Colorectal Neoplasms	hsa-mir-376b	0.12706
Carcinoma Non-Small-Cell Lung	hsa-mir-203	0.126988
Rectal Neoplasms	hsa-mir-34a	0.126811
Heart Failure	hsa-mir-326	0.126807
Prostatic Neoplasms	hsa-mir-424	0.126698
Glioma	hsa-mir-132	0.126637
Stomach Neoplasms	hsa-mir-765	0.126628
Ovarian Neoplasms	hsa-mir-328	0.126504
Endometriosis	hsa-mir-92a	0.12648
Colorectal Neoplasms	hsa-mir-520d	0.126469
Colorectal Neoplasms	hsa-mir-1224	0.126467
Stomach Neoplasms	hsa-mir-484	0.12642
Lung Neoplasms	hsa-mir-129	0.126369
Lupus Vulgaris	hsa-mir-93	0.126328
Ovarian Neoplasms	hsa-mir-548b	0.126317
Lupus Vulgaris	hsa-mir-27a	0.126306
Colorectal Neoplasms	hsa-mir-519d	0.12629
Heart Failure	hsa-mir-663a	0.126278
Autistic Disorder	hsa-mir-34a	0.126277
Carcinoma Renal Cell	hsa-mir-491	0.126166
Carcinoma Renal Cell	hsa-mir-432	0.126128
Lupus Vulgaris	hsa-mir-146b	0.126066
Breast Neoplasms	hsa-mir-138	0.12601
Glioblastoma	hsa-mir-203	0.125887
Colonic Neoplasms	hsa-mir-214	0.12585
Carcinoma Renal Cell	hsa-mir-302a	0.125763
Lung Neoplasms	hsa-mir-320c	0.125748
Gastrointestinal Neoplasms	hsa-mir-17	0.12559
Urinary Bladder Neoplasms	hsa-mir-206	0.125532
Adenocarcinoma	hsa-mir-18a	0.125511
Carcinoma Squamous Cell	hsa-mir-373	0.125506
Endometriosis	hsa-mir-196a	0.125451
Lupus Vulgaris	hsa-mir-373	0.125412
Breast Neoplasms	hsa-mir-431	0.12528
Head and Neck Neoplasms	hsa-mir-200b	0.125257
Lung Neoplasms	hsa-mir-433	0.125183
Neoplasms	hsa-mir-124	0.125174
Carcinoma Hepatocellular	hsa-mir-516a	0.125152
Neoplasms	hsa-mir-491	0.125138
Neoplasms	hsa-mir-130a	0.125117
Heart Failure	hsa-mir-370	0.125101
Carcinoma Renal Cell	hsa-mir-137	0.125045
Head and Neck Neoplasms	hsa-mir-222	0.125023
Melanoma	hsa-mir-1224	0.125018
Prostatic Neoplasms	hsa-mir-208a	0.124958
Esophageal Neoplasms	hsa-mir-1287	0.124943
Esophageal Neoplasms	hsa-mir-641	0.124943
Lung Neoplasms	hsa-mir-302c	0.124903
Carcinoma Hepatocellular	hsa-mir-1246	0.124897
Prostatic Neoplasms	hsa-mir-376b	0.124878
Lupus Vulgaris	hsa-mir-132	0.124875
Pancreatic Neoplasms	hsa-mir-30e	0.124762
Rectal Neoplasms	hsa-mir-29a	0.12474
Carcinoma Renal Cell	hsa-mir-328	0.124704
Adenoviridae Infections	hsa-mir-125a	0.124538
Neoplasms Squamous Cell	hsa-mir-17	0.124432
Medulloblastoma	hsa-mir-150	0.124334
Medulloblastoma	hsa-mir-29c	0.12424
Colonic Neoplasms	hsa-mir-200a	0.124238
Carcinoma Hepatocellular	hsa-mir-451	0.124203
Urinary Bladder Neoplasms	hsa-let-7f	0.124193
Carcinoma Renal Cell	hsa-mir-342	0.124141
Leukemia Myeloid Acute	hsa-mir-200b	0.124071
Adenoviridae Infections	hsa-mir-206	0.123942
Pancreatic Neoplasms	hsa-mir-184	0.12393
Carcinoma Renal Cell	hsa-mir-486	0.123883
Carcinoma Squamous Cell	hsa-mir-132	0.12374
Muscular Disorders Atrophic	hsa-mir-133a	0.123731
Leukemia Myeloid Acute	hsa-mir-30b	0.123728
Stomach Neoplasms	hsa-mir-488	0.123686
Prostatic Neoplasms	hsa-mir-148b	0.123677
Urinary Bladder Neoplasms	hsa-let-7i	0.123657
Colorectal Neoplasms	hsa-mir-196b	0.123633
Medulloblastoma	hsa-mir-34c	0.123621
Head and Neck Neoplasms	hsa-mir-92a	0.123531
Carcinoma Hepatocellular	hsa-mir-596	0.12347
Lymphoma	hsa-mir-221	0.123436
Heart Failure	hsa-mir-433	0.123394
Stomach Neoplasms	hsa-mir-492	0.123372
Neoplasms	hsa-mir-486	0.123122
Glioblastoma	hsa-mir-372	0.123003
Heart Failure	hsa-mir-127	0.122993
Carcinoma	hsa-mir-199a	0.12293
Colorectal Neoplasms	hsa-mir-153	0.12288
Stomach Neoplasms	hsa-mir-181d	0.122877
Medulloblastoma	hsa-mir-181a	0.12285
Heart Failure	hsa-mir-371a	0.122766
Stomach Neoplasms	hsa-mir-215	0.122755
Endometrial Neoplasms	hsa-mir-19a	0.122748
Glioma	hsa-mir-212	0.122468
Adenoviridae Infections	hsa-mir-182	0.122419
Nasopharyngeal Neoplasms	hsa-mir-29b	0.122366
Stomach Neoplasms	hsa-mir-708	0.122288
Heart Failure	hsa-mir-198	0.12228
Head and Neck Neoplasms	hsa-mir-196a	0.122204
Lung Neoplasms	hsa-mir-363	0.122188
Autistic Disorder	hsa-mir-29a	0.122091
Thyroid Neoplasms	hsa-mir-106b	0.122083
Prostatic Neoplasms	hsa-mir-491	0.122069
Myocardial Infarction	hsa-mir-146a	0.121981
Lupus Vulgaris	hsa-mir-212	0.121961
Urinary Bladder Neoplasms	hsa-mir-146b	0.121877
Lymphoma	hsa-mir-199a	0.121874
Neoplasms	hsa-mir-342	0.121839
Lung Neoplasms	hsa-mir-451a	0.121818
Medulloblastoma	hsa-mir-192	0.121765
Melanoma	hsa-mir-196b	0.121741
Neoplasms	hsa-mir-328	0.121675
Carcinoma Non-Small-Cell Lung	hsa-mir-24	0.121607
Head and Neck Neoplasms	hsa-mir-30b	0.12154
Lung Neoplasms	hsa-mir-371a	0.121536
Heart Failure	hsa-mir-629	0.121483
Carcinoma Renal Cell	hsa-mir-548b	0.121394
Nasopharyngeal Neoplasms	hsa-mir-145	0.121344
Gastrointestinal Neoplasms	hsa-mir-34a	0.121257
Heart Failure	hsa-mir-451a	0.121187
Carcinoma Non-Small-Cell Lung	hsa-mir-32	0.121159
Prostatic Neoplasms	hsa-mir-302a	0.121113
Colonic Neoplasms	hsa-mir-181a	0.12104
Glioblastoma	hsa-mir-24	0.120908
Stomach Neoplasms	hsa-mir-1286	0.120894
Heart Failure	hsa-mir-363	0.120846
Colonic Neoplasms	hsa-mir-150	0.120838
Ovarian Neoplasms	hsa-mir-571	0.120828
Uterine Cervical Neoplasms	hsa-mir-1	0.120784
Carcinoma Hepatocellular	hsa-mir-941	0.120771
Carcinoma Renal Cell	hsa-mir-362	0.120708
Melanoma	hsa-mir-574	0.120698
Urinary Bladder Neoplasms	hsa-mir-373	0.120688
Adenocarcinoma	hsa-mir-19a	0.12059
Esophageal Neoplasms	hsa-mir-181a	0.120574
Endometriosis	hsa-mir-210	0.120433
Pre-Eclampsia	hsa-mir-146a	0.120367
Lung Neoplasms	hsa-mir-432	0.120341
Ovarian Neoplasms	hsa-mir-28	0.120299
Carcinoma Non-Small-Cell Lung	hsa-mir-25	0.12029
Neoplasms	hsa-mir-362	0.120272
Colorectal Neoplasms	hsa-mir-509	0.120188
Medulloblastoma	hsa-mir-141	0.120155
Medulloblastoma	hsa-mir-200c	0.120018
Adenoviridae Infections	hsa-mir-93	0.120011
Pancreatic Neoplasms	hsa-mir-7	0.12001
Colorectal Neoplasms	hsa-mir-10a	0.11992
Glioblastoma	hsa-mir-519d	0.119913
Pancreatic Neoplasms	hsa-mir-23b	0.119879
Colonic Neoplasms	hsa-mir-29c	0.11982
Melanoma	hsa-mir-376b	0.119753
Gastrointestinal Neoplasms	hsa-mir-29a	0.119737
Heart Failure	hsa-mir-485	0.119729
Colorectal Neoplasms	hsa-mir-637	0.119717
Colonic Neoplasms	hsa-mir-34c	0.119636
Endometriosis	hsa-mir-15a	0.119607
Adenocarcinoma	hsa-mir-1	0.119465
Nasopharyngeal Neoplasms	hsa-mir-19b	0.11943
Melanoma	hsa-mir-10a	0.119259
Endometriosis	hsa-mir-26a	0.119223
Hepatitis C	hsa-mir-146a	0.119206
Ovarian Neoplasms	hsa-mir-197	0.119169
Colorectal Neoplasms	hsa-mir-98	0.119158
Esophageal Neoplasms	hsa-mir-432	0.119028
Carcinoma Non-Small-Cell Lung	hsa-mir-184	0.118975
Colorectal Neoplasms	hsa-mir-99b	0.118964
Lung Neoplasms	hsa-mir-339	0.11895
Lung Neoplasms	hsa-mir-485	0.118887
Glioma	hsa-mir-205	0.118861
Prostatic Neoplasms	hsa-mir-137	0.118829
Carcinoma Renal Cell	hsa-mir-320c	0.11879
Ovarian Neoplasms	hsa-mir-320c	0.118707
Lung Neoplasms	hsa-mir-92b	0.118663
Melanoma	hsa-mir-637	0.118654
Medulloblastoma	hsa-mir-15b	0.118584
Prostatic Neoplasms	hsa-mir-328	0.118565
Salivary Gland Neoplasms	hsa-mir-146a	0.118559
Prostatic Neoplasms	hsa-mir-342	0.118429
Autistic Disorder	hsa-mir-125b	0.118349
Neoplasms	hsa-mir-320a	0.118304
Urinary Bladder Neoplasms	hsa-mir-132	0.118298
Lung Neoplasms	hsa-mir-324	0.118266
Breast Neoplasms	hsa-mir-550a	0.11824
Carcinoma Basal Cell	hsa-mir-20a	0.118157
Glioma	hsa-mir-101	0.118053
Stomach Neoplasms	hsa-mir-1287	0.117847
Stomach Neoplasms	hsa-mir-641	0.117847
Carcinoma Basal Cell	hsa-mir-125b	0.117659
Melanoma	hsa-mir-98	0.117599
Head and Neck Neoplasms	hsa-mir-210	0.117561
Carcinoma Squamous Cell	hsa-mir-212	0.117531
Melanoma	hsa-mir-99b	0.117488
Leukemia Myeloid Acute	hsa-mir-210	0.117487
Lymphoma	hsa-mir-133a	0.117379
Neoplasms Squamous Cell	hsa-mir-29a	0.117369
Uterine Cervical Neoplasms	hsa-let-7a	0.117328
Medulloblastoma	hsa-mir-195	0.117287
Glioblastoma	hsa-mir-30e	0.117273
Nasopharyngeal Neoplasms	hsa-mir-221	0.117256
Ovarian Neoplasms	hsa-mir-326	0.117194
Stomach Neoplasms	hsa-mir-519b	0.11703
Muscular Disorders Atrophic	hsa-mir-18a	0.117001
Medulloblastoma	hsa-mir-142	0.116978
Stomach Neoplasms	hsa-mir-188	0.116862
Carcinoma Hepatocellular	hsa-mir-545	0.116822
Breast Neoplasms	hsa-mir-675	0.116784
Carcinoma	hsa-mir-133a	0.116707
Stomach Neoplasms	hsa-mir-211	0.116667
Colorectal Neoplasms	hsa-mir-298	0.11658
Glioblastoma	hsa-mir-133b	0.11658
Prostatic Neoplasms	hsa-mir-10b	0.116536
Melanoma	hsa-mir-432	0.116529
Neoplasms	hsa-mir-100	0.116505
Prostatic Neoplasms	hsa-mir-362	0.116489
Breast Neoplasms	hsa-mir-374b	0.116437
Neoplasms	hsa-mir-519d	0.116418
Medulloblastoma	hsa-mir-34b	0.116416
Thyroid Neoplasms	hsa-mir-30b	0.116377
Lupus Vulgaris	hsa-mir-205	0.116236
Heart Failure	hsa-mir-324	0.116228
Heart Failure	hsa-mir-194	0.116188
Ovarian Neoplasms	hsa-mir-26b	0.116179
Thyroid Neoplasms	hsa-mir-196a	0.116121
Colonic Neoplasms	hsa-mir-15b	0.116113
Breast Neoplasms	hsa-mir-384	0.116075
Head and Neck Neoplasms	hsa-mir-26a	0.116063
Esophageal Neoplasms	hsa-mir-142	0.115999
Colonic Neoplasms	hsa-mir-148a	0.115942
Adenoviridae Infections	hsa-mir-373	0.115917
Lung Neoplasms	hsa-mir-194	0.11581
Heart Failure	hsa-mir-1224	0.115723
Lung Neoplasms	hsa-mir-376b	0.115596
Nasopharyngeal Neoplasms	hsa-mir-16	0.115547
Esophageal Neoplasms	hsa-mir-15b	0.115505
Heart Failure	hsa-mir-574	0.115484
Ovarian Neoplasms	hsa-mir-663a	0.115479
Prostatic Neoplasms	hsa-mir-302b	0.115472
Esophageal Neoplasms	hsa-mir-195	0.115457
Lupus Vulgaris	hsa-mir-101	0.115447
Glioblastoma	hsa-let-7g	0.115408
Glioma	hsa-mir-23a	0.115406
Medulloblastoma	hsa-mir-122	0.115383
Lung Neoplasms	hsa-mir-1224	0.115355
Carcinoma Renal Cell	hsa-mir-28	0.115181
Thyroid Neoplasms	hsa-mir-15a	0.115151
Carcinoma Renal Cell	hsa-mir-193b	0.115105
Carcinoma Squamous Cell	hsa-mir-23a	0.115057
Hypertrophy	hsa-mir-17	0.115039
Ovarian Neoplasms	hsa-mir-129	0.11502
Medulloblastoma	hsa-mir-429	0.115002
Carcinoma Renal Cell	hsa-mir-197	0.114957
Medulloblastoma	hsa-let-7d	0.114893
Glioma	hsa-mir-372	0.114873
Breast Neoplasms	hsa-mir-500a	0.114843
Stomach Neoplasms	hsa-mir-539	0.114832
Rectal Neoplasms	hsa-mir-20a	0.114799
Pancreatic Neoplasms	hsa-mir-20b	0.114773
Heart Failure	hsa-mir-153	0.114763
Endometriosis	hsa-mir-519d	0.114733
Breast Neoplasms	hsa-mir-628	0.11456
Heart Failure	hsa-mir-99a	0.114554
Colorectal Neoplasms	hsa-mir-30d	0.114476
Colonic Neoplasms	hsa-mir-195	0.114334
Carcinoma Hepatocellular	hsa-mir-659	0.114318
Carcinoma	hsa-mir-126	0.11431
Osteosarcoma	hsa-mir-146a	0.114306
Pancreatic Neoplasms	hsa-mir-208b	0.114291
Glioma	hsa-mir-32	0.114237
Nasopharyngeal Neoplasms	hsa-mir-199a	0.114225
Carcinoma Non-Small-Cell Lung	hsa-mir-23b	0.114197
Esophageal Neoplasms	hsa-mir-1290	0.113994
Thyroid Neoplasms	hsa-mir-223	0.113988
Lung Neoplasms	hsa-mir-99a	0.113982
Melanoma	hsa-mir-128	0.113949
Adrenocortical Carcinoma	hsa-mir-15a	0.113897
Carcinoma Renal Cell	hsa-mir-326	0.113892
Heart Failure	hsa-mir-96	0.113885
Medulloblastoma	hsa-let-7e	0.11387
Colonic Neoplasms	hsa-mir-182	0.113832
Carcinoma Basal Cell	hsa-mir-29b	0.113806
Melanoma	hsa-mir-144	0.113737
Glioma	hsa-mir-203	0.113707
Stomach Neoplasms	hsa-mir-154	0.113607
Melanoma	hsa-mir-423	0.113603
Esophageal Neoplasms	hsa-mir-429	0.113468
Stomach Neoplasms	hsa-mir-510	0.113444
Carcinoma Hepatocellular	hsa-mir-449a	0.113431
Carcinoma Hepatocellular	hsa-mir-922	0.11336
Esophageal Neoplasms	hsa-mir-9	0.113352
Colorectal Neoplasms	hsa-mir-128	0.113291
Carcinoma Renal Cell	hsa-mir-370	0.11329
Lung Neoplasms	hsa-mir-520d	0.113277
Colorectal Neoplasms	hsa-mir-490	0.113253
Carcinoma Hepatocellular	hsa-mir-767	0.113076
Pancreatic Neoplasms	hsa-mir-503	0.113019
Melanoma	hsa-mir-490	0.112905
Neoplasms	hsa-mir-326	0.112905
Carcinoma Renal Cell	hsa-mir-198	0.112894
Carcinoma Hepatocellular	hsa-mir-147b	0.112772
Colonic Neoplasms	hsa-mir-429	0.112749
Breast Neoplasms	hsa-mir-216a	0.11271
Pancreatic Neoplasms	hsa-mir-219	0.112664
Esophageal Neoplasms	hsa-let-7d	0.112629
Lung Neoplasms	hsa-mir-519d	0.112622
Colonic Neoplasms	hsa-mir-34b	0.11262
Carcinoma Renal Cell	hsa-mir-663a	0.112615
Myotonic Dystrophy	hsa-mir-155	0.112542
Prostatic Neoplasms	hsa-mir-525	0.112458
Leukemia Lymphocytic Chronic B-Cell	hsa-mir-145	0.11244
Urinary Bladder Neoplasms	hsa-mir-519d	0.112426
Neoplasms	hsa-mir-197	0.112417
Adenoviridae Infections	hsa-mir-132	0.112377
Lupus Vulgaris	hsa-mir-106a	0.112303
Muscular Disorders Atrophic	hsa-mir-19a	0.112265
Autistic Disorder	hsa-mir-20a	0.112203
Esophageal Neoplasms	hsa-let-7e	0.112148
Medulloblastoma	hsa-mir-206	0.112047
Lung Neoplasms	hsa-mir-367	0.112016
Ovarian Neoplasms	hsa-mir-451a	0.111954
Ovarian Neoplasms	hsa-mir-198	0.111886
Carcinoma Hepatocellular	hsa-mir-671	0.111867
Lupus Vulgaris	hsa-mir-203	0.111857
Esophageal Neoplasms	hsa-mir-122	0.111786
Endometrial Neoplasms	hsa-mir-106b	0.111705
Adrenocortical Carcinoma	hsa-mir-30b	0.111696
Esophageal Neoplasms	hsa-mir-125a	0.111691
Carcinoma	hsa-mir-18a	0.111691
Prostatic Neoplasms	hsa-mir-517a	0.111661
Melanoma	hsa-mir-298	0.111559
Neoplasms	hsa-mir-320c	0.111521
Stomach Neoplasms	hsa-mir-431	0.111478
Muscular Disorders Atrophic	hsa-mir-1	0.11146
Lung Neoplasms	hsa-mir-153	0.111371
Melanoma	hsa-mir-497	0.111311
Breast Neoplasms	hsa-mir-337	0.11129
Medulloblastoma	hsa-let-7f	0.111266
Pancreatic Neoplasms	hsa-mir-483	0.111238
Adenoviridae Infections	hsa-mir-205	0.11123
Prostatic Neoplasms	hsa-mir-28	0.111215
Uterine Cervical Neoplasms	hsa-mir-106b	0.111214
Carcinoma Non-Small-Cell Lung	hsa-mir-181b	0.111196
Endometriosis	hsa-mir-214	0.111168
Mesothelioma	hsa-mir-34a	0.111128
Hypertrophy	hsa-mir-34a	0.111123
Esophageal Neoplasms	hsa-mir-182	0.11105
Heart Failure	hsa-mir-196b	0.111031
Ovarian Neoplasms	hsa-mir-363	0.111012
Rectal Neoplasms	hsa-mir-29b	0.110991
Thyroid Neoplasms	hsa-mir-210	0.110967
Adrenocortical Carcinoma	hsa-mir-92a	0.11096
Colonic Neoplasms	hsa-mir-212	0.11091
Medulloblastoma	hsa-let-7i	0.110892
Lung Neoplasms	hsa-mir-196b	0.110892
Stomach Neoplasms	hsa-mir-152	0.110864
Carcinoma Squamous Cell	hsa-mir-32	0.110839
Esophageal Neoplasms	hsa-mir-206	0.110801
Neoplasms	hsa-mir-26b	0.11076
Stomach Neoplasms	hsa-mir-138	0.110707
Glioblastoma	hsa-mir-204	0.110694
Melanoma	hsa-mir-548b	0.110684
Rhabdomyosarcoma	hsa-mir-21	0.110679
Carcinoma Renal Cell	hsa-mir-433	0.110679
Cystitis Interstitial	hsa-mir-21	0.110609
Carcinoma Squamous Cell	hsa-mir-372	0.110607
Leukemia-Lymphoma Adult T-Cell	hsa-mir-21	0.110597
Lupus Vulgaris	hsa-mir-372	0.110534
Pancreatic Neoplasms	hsa-mir-494	0.110504
Ovarian Neoplasms	hsa-mir-371a	0.110461
Lymphoma T-Cell	hsa-mir-21	0.110448
Tuberculosis Pulmonary	hsa-mir-17	0.110385
Ovarian Neoplasms	hsa-mir-324	0.110286
Neoplasms	hsa-mir-129	0.110235
Hemangiosarcoma	hsa-mir-21	0.110214
Neoplasms	hsa-mir-433	0.110196
Carcinoma Non-Small-Cell Lung	hsa-mir-20b	0.110184
Colonic Neoplasms	hsa-mir-122	0.110137
Breast Neoplasms	hsa-mir-216b	0.110037
Neuroblastoma	hsa-mir-29a	0.110025
Colorectal Neoplasms	hsa-mir-1290	0.11
Heart Failure	hsa-mir-376b	0.10997
Thyroid Neoplasms	hsa-mir-26a	0.109918
Urinary Bladder Neoplasms	hsa-mir-23a	0.109916
Carcinoma Non-Small-Cell Lung	hsa-mir-208b	0.109885
Ovarian Neoplasms	hsa-mir-485	0.109881
Adrenocortical Carcinoma	hsa-mir-223	0.10985
Colonic Neoplasms	hsa-mir-206	0.109831
Nasopharyngeal Neoplasms	hsa-mir-133a	0.109819
Esophageal Neoplasms	hsa-let-7f	0.109748
Mycosis Fungoides	hsa-mir-21	0.109736
Sepsis	hsa-mir-21	0.109729
Hypertrophy	hsa-mir-29a	0.109701
Adenocarcinoma	hsa-mir-106b	0.109677
Retinal Neovascularization	hsa-mir-21	0.10958
Heart Failure	hsa-mir-375	0.109523
Hepatitis Chronic	hsa-mir-21	0.109513
Carcinoma Non-Small-Cell Lung	hsa-mir-519d	0.109477
Prostatic Neoplasms	hsa-mir-197	0.109437
Carcinoma Renal Cell	hsa-mir-95	0.109427
Esophageal Neoplasms	hsa-let-7i	0.109395
Adenoviridae Infections	hsa-mir-23a	0.109393
Carcinoma Non-Small-Cell Lung	hsa-mir-224	0.109376
Lung Neoplasms	hsa-mir-509	0.10936
Neoplasms	hsa-mir-198	0.109354
Waldenstrom Macroglobulinemia	hsa-mir-21	0.109354
Autistic Disorder	hsa-mir-145	0.109338
Prostatic Neoplasms	hsa-mir-320c	0.109263
Prostatic Neoplasms	hsa-mir-326	0.109161
Carcinoma Hepatocellular	hsa-mir-519a	0.109155
Carcinoma Renal Cell	hsa-mir-499a	0.109143
Carcinoma Non-Small-Cell Lung	hsa-mir-31	0.109075
Crohn Disease	hsa-mir-21	0.109032
Autistic Disorder	hsa-mir-29b	0.10894
Testicular Neoplasms	hsa-mir-21	0.108927
Medulloblastoma	hsa-mir-93	0.108892
Gastrointestinal Neoplasms	hsa-mir-125b	0.108799
Gastrointestinal Neoplasms	hsa-mir-20a	0.108751
Prostatic Neoplasms	hsa-mir-663a	0.108733
Stomach Neoplasms	hsa-mir-520h	0.108694
Glioma	hsa-mir-184	0.108686
Medulloblastoma	hsa-mir-146b	0.108609
Carcinoma Non-Small-Cell Lung	hsa-mir-503	0.108588
Heart Failure	hsa-mir-10a	0.10858
Medulloblastoma	hsa-mir-27a	0.108567
Periodontitis	hsa-mir-21	0.108566
Carcinoma Non-Small-Cell Lung	hsa-mir-204	0.108523
Pituitary Neoplasms	hsa-mir-146a	0.108497
Lupus Nephritis	hsa-mir-21	0.108493
Rectal Neoplasms	hsa-mir-19b	0.108459
Muscular Dystrophies	hsa-mir-21	0.108451
Colorectal Neoplasms	hsa-mir-410	0.10831
Muscular Disorders Atrophic	hsa-let-7a	0.108291
Breast Neoplasms	hsa-mir-489	0.108266
Endometrial Neoplasms	hsa-mir-222	0.108261
Lung Neoplasms	hsa-mir-637	0.108191
Stomach Neoplasms	hsa-mir-638	0.108171
Uterine Cervical Neoplasms	hsa-mir-200b	0.108161
Stomach Neoplasms	hsa-mir-320b	0.10809
Thyroid Neoplasms	hsa-let-7b	0.108055
Colorectal Neoplasms	hsa-mir-217	0.108039
Heart Failure	hsa-mir-99b	0.108013
Glioblastoma	hsa-mir-199b	0.108012
Heart Failure	hsa-mir-509	0.108008
Stroke	hsa-mir-21	0.107929
Lung Neoplasms	hsa-mir-10a	0.107929
Uterine Cervical Neoplasms	hsa-mir-222	0.107878
Rhinitis Allergic Perennial	hsa-mir-21	0.107816
Neoplasms Squamous Cell	hsa-mir-125b	0.107798
Glioblastoma	hsa-mir-503	0.107791
Leukemia	hsa-mir-146a	0.107777
Glioma	hsa-mir-25	0.107772
Head and Neck Neoplasms	hsa-mir-214	0.107754
Carcinoma Hepatocellular	hsa-mir-422a	0.10775
Ependymoma	hsa-mir-21	0.107712
Urinary Bladder Neoplasms	hsa-mir-106a	0.107689
Neoplasms Squamous Cell	hsa-mir-20a	0.107669
Esophageal Neoplasms	hsa-mir-93	0.107658
Mouth Neoplasms	hsa-mir-146a	0.107587
Prostatic Neoplasms	hsa-mir-26b	0.107546
Heart Failure	hsa-mir-637	0.107475
Biliary Tract Neoplasms	hsa-mir-21	0.107405
Carcinoma Non-Small-Cell Lung	hsa-mir-219	0.107312
Prostatic Neoplasms	hsa-mir-302c	0.107203
Arthritis Rheumatoid	hsa-mir-21	0.107202
Lupus Vulgaris	hsa-mir-24	0.107193
Colorectal Neoplasms	hsa-mir-130b	0.107182
Carcinoma	hsa-mir-19a	0.107117
Carcinoma Squamous Cell	hsa-mir-25	0.107116
Carcinoma Renal Cell	hsa-mir-1287	0.107098
Carcinoma Renal Cell	hsa-mir-641	0.107098
Leukemia Myeloid Acute	hsa-mir-214	0.107052
Multiple Myeloma	hsa-mir-146a	0.107052
Carcinoma Basal Cell	hsa-mir-16	0.107019
Colonic Neoplasms	hsa-mir-93	0.10698
Prostatic Neoplasms	hsa-mir-129	0.106978
Carcinoma Renal Cell	hsa-mir-371a	0.106916
Prostatic Neoplasms	hsa-mir-370	0.106846
Lung Neoplasms	hsa-mir-99b	0.106846
Esophageal Neoplasms	hsa-mir-146b	0.106844
Urinary Bladder Neoplasms	hsa-mir-30a	0.106837
Glioblastoma	hsa-mir-219	0.10683
Neoplasms	hsa-mir-499a	0.106801
Adenoviridae Infections	hsa-mir-106a	0.106797
Endometriosis	hsa-mir-181a	0.106788
Carcinoma Renal Cell	hsa-mir-1286	0.106728
Carcinoma Basal Cell	hsa-mir-221	0.106681
Carcinoma Renal Cell	hsa-mir-485	0.106681
Prostatic Neoplasms	hsa-mir-433	0.106665
Neoplasms	hsa-mir-629	0.106643
Nasopharyngeal Neoplasms	hsa-mir-126	0.106621
Neoplasms	hsa-mir-363	0.106569
Breast Neoplasms	hsa-mir-596	0.106561
Endometrial Neoplasms	hsa-mir-30b	0.106556
Leukemia Lymphocytic Chronic B-Cell	hsa-mir-199a	0.106503
Colorectal Neoplasms	hsa-mir-382	0.106471
Breast Neoplasms	hsa-mir-1246	0.10638
Carcinoma Non-Small-Cell Lung	hsa-mir-494	0.106361
Stomach Neoplasms	hsa-mir-874	0.106357
Adenocarcinoma	hsa-mir-222	0.106346
Melanoma	hsa-mir-130b	0.106292
Head and Neck Neoplasms	hsa-mir-200a	0.106227
Breast Neoplasms	hsa-mir-520e	0.106165
Autistic Disorder	hsa-mir-19b	0.106158
Glioblastoma	hsa-mir-494	0.10615
Uterine Cervical Neoplasms	hsa-mir-30b	0.106096
Colorectal Neoplasms	hsa-mir-506	0.106052
Carcinoma Non-Small-Cell Lung	hsa-mir-483	0.106048
Endometrial Neoplasms	hsa-mir-92a	0.106034
Uterine Cervical Neoplasms	hsa-mir-92a	0.105996
Urinary Bladder Neoplasms	hsa-mir-372	0.105955
Adenoviridae Infections	hsa-mir-212	0.105934
Gastrointestinal Neoplasms	hsa-mir-29b	0.105915
Ovarian Neoplasms	hsa-mir-376b	0.105865
Heart Failure	hsa-mir-30d	0.105785
Lymphoma	hsa-mir-1	0.105722
Colonic Neoplasms	hsa-mir-146b	0.105718
Glioblastoma	hsa-mir-483	0.105718
Colorectal Neoplasms	hsa-mir-381	0.105662
Medulloblastoma	hsa-mir-132	0.105645
Breast Neoplasms	hsa-mir-451	0.105571
Lupus Vulgaris	hsa-mir-32	0.105567
Endometrial Neoplasms	hsa-mir-196a	0.10551
Breast Neoplasms	hsa-mir-190a	0.105497
Carcinoma Squamous Cell	hsa-mir-30e	0.105409
Pancreatic Neoplasms	hsa-mir-335	0.10539
Lupus Vulgaris	hsa-mir-25	0.105381
Melanoma	hsa-mir-498	0.105269
Adenoviridae Infections	hsa-mir-203	0.105224
Carcinoma	hsa-mir-1	0.105213
Leukemia Myeloid Acute	hsa-mir-200a	0.105165
Adrenocortical Carcinoma	hsa-mir-26a	0.105066
Colorectal Neoplasms	hsa-mir-320d	0.105063
Neoplasms	hsa-mir-485	0.10504
Colonic Neoplasms	hsa-mir-27a	0.105022
Neoplasms	hsa-mir-339	0.105008
Carcinoma Basal Cell	hsa-mir-199a	0.104995
Prostatic Neoplasms	hsa-mir-371a	0.10491
Lung Neoplasms	hsa-mir-423	0.104908
Carcinoma Hepatocellular	hsa-mir-520f	0.104899
Carcinoma Hepatocellular	hsa-mir-520g	0.104899
Rectal Neoplasms	hsa-mir-221	0.104847
Adenocarcinoma	hsa-mir-30b	0.104834
Melanoma	hsa-mir-410	0.10481
Melanoma	hsa-mir-571	0.104731
Leukemia Myeloid Acute	hsa-mir-29c	0.104725
Rectal Neoplasms	hsa-mir-199a	0.10468
Stomach Neoplasms	hsa-mir-584	0.104677
Coronary Artery Disease	hsa-mir-155	0.104652
Lupus Vulgaris	hsa-mir-133b	0.104615
Carcinoma Hepatocellular	hsa-mir-1302	0.104531
Thyroid Neoplasms	hsa-let-7c	0.104529
Neoplasms	hsa-mir-520d	0.104525
Gastrointestinal Neoplasms	hsa-mir-145	0.1045
Lung Neoplasms	hsa-mir-144	0.10447
Colorectal Neoplasms	hsa-mir-513a	0.104458
Lupus Vulgaris	hsa-mir-30e	0.104427
Carcinoma Squamous Cell	hsa-mir-7	0.104426
Heart Failure	hsa-mir-144	0.104401
Pancreatic Neoplasms	hsa-mir-140	0.104398
Glioma	hsa-mir-133b	0.104391
Stomach Neoplasms	hsa-mir-384	0.104327
Carcinoma Renal Cell	hsa-mir-92b	0.104276
Colorectal Neoplasms	hsa-mir-548b	0.104274
Heart Failure	hsa-mir-128	0.104238
Stomach Neoplasms	hsa-mir-365a	0.10422
Infertility Male	hsa-mir-21	0.104195
Pancreatic Neoplasms	hsa-mir-424	0.104148
Prolactinoma	hsa-mir-155	0.104137
Melanoma	hsa-mir-187	0.104126
Ovarian Neoplasms	hsa-mir-520d	0.104114
Endometriosis	hsa-mir-148a	0.104111
Neoplasms Squamous Cell	hsa-mir-29b	0.104076
Urinary Bladder Neoplasms	hsa-mir-32	0.104066
Carcinoma Renal Cell	hsa-mir-324	0.104044
Tuberculosis Pulmonary	hsa-mir-34a	0.103997
Colorectal Neoplasms	hsa-mir-191	0.10395
Myocardial Infarction	hsa-mir-17	0.103924
Gout	hsa-mir-155	0.103877
Carcinoma Hepatocellular	hsa-mir-625	0.103874
Pancreatic Neoplasms	hsa-mir-181c	0.103866
Endometriosis	hsa-mir-192	0.10386
Stomach Neoplasms	hsa-mir-675	0.103849
Endometrial Neoplasms	hsa-mir-223	0.10381
Heart Failure	hsa-mir-95	0.103774
Prostatic Neoplasms	hsa-mir-363	0.103761
Glioma	hsa-let-7g	0.103725
Head and Neck Neoplasms	hsa-mir-150	0.103701
Melanoma	hsa-mir-320d	0.1037
Melanoma	hsa-mir-381	0.103685
Stomach Neoplasms	hsa-mir-520b	0.103676
Uterine Cervical Neoplasms	hsa-mir-223	0.103676
Carcinoma Squamous Cell	hsa-mir-183	0.10367
Colonic Neoplasms	hsa-mir-373	0.10362
Melanoma	hsa-mir-382	0.10359
Autistic Disorder	hsa-mir-221	0.103551
Pancreatic Neoplasms	hsa-mir-27b	0.103521
Glioblastoma	hsa-mir-107	0.103433
Carcinoma Squamous Cell	hsa-let-7g	0.103391
Prostatic Neoplasms	hsa-mir-451a	0.103385
Pancreatic Neoplasms	hsa-mir-208a	0.103353
Esophageal Neoplasms	hsa-mir-373	0.103298
Autistic Disorder	hsa-mir-16	0.10326
Hepatitis C	hsa-mir-17	0.103244
Lymphoma	hsa-let-7a	0.10323
Endometriosis	hsa-mir-373	0.103085
Neoplasms Squamous Cell	hsa-mir-145	0.103057
Esophageal Neoplasms	hsa-mir-95	0.103029
Prostatic Neoplasms	hsa-mir-499a	0.103028
Stomach Neoplasms	hsa-mir-550a	0.103003
Ovarian Neoplasms	hsa-mir-1224	0.102957
Leukemia Myeloid Acute	hsa-mir-148a	0.102932
Carcinoma Hepatocellular	hsa-mir-340	0.102907
Lupus Vulgaris	hsa-let-7g	0.102902
Carcinoma Non-Small-Cell Lung	hsa-mir-107	0.102892
Salivary Gland Neoplasms	hsa-mir-17	0.102851
Neoplasms	hsa-mir-324	0.102848
Glioblastoma	hsa-mir-424	0.102831
Gastrointestinal Neoplasms	hsa-mir-19b	0.102771
Adenoviridae Infections	hsa-mir-372	0.102733
Prostatic Neoplasms	hsa-mir-323a	0.10273
Breast Neoplasms	hsa-mir-421	0.102578
Muscular Disorders Atrophic	hsa-mir-106b	0.102567
Pancreatic Neoplasms	hsa-mir-148b	0.102534
Colorectal Neoplasms	hsa-mir-498	0.102468
Carcinoma Renal Cell	hsa-mir-194	0.102432
Pancreatic Neoplasms	hsa-mir-301a	0.102419
Lupus Vulgaris	hsa-mir-183	0.102406
Breast Neoplasms	hsa-mir-545	0.102403
Leukemia Lymphocytic Chronic B-Cell	hsa-mir-133a	0.102349
Glioblastoma	hsa-mir-525	0.102318
Carcinoma Hepatocellular	hsa-mir-548c	0.102316
Endometrial Neoplasms	hsa-mir-15a	0.102291
Lung Neoplasms	hsa-mir-490	0.102289
Head and Neck Neoplasms	hsa-mir-34c	0.102239
Ovarian Neoplasms	hsa-mir-10a	0.102238
Urinary Bladder Neoplasms	hsa-mir-25	0.102221
Autistic Disorder	hsa-mir-199a	0.102189
Neoplasms Squamous Cell	hsa-mir-19b	0.102146
Esophageal Neoplasms	hsa-mir-132	0.102129
Leukemia Myeloid Acute	hsa-mir-34c	0.102096
Urinary Bladder Neoplasms	hsa-mir-184	0.102093
Uterine Cervical Neoplasms	hsa-mir-15a	0.102081
Adenoviridae Infections	hsa-mir-24	0.102072
Carcinoma Hepatocellular	hsa-mir-668	0.101959
Breast Neoplasms	hsa-mir-941	0.101956
Prostatic Neoplasms	hsa-mir-339	0.101955
Ovarian Neoplasms	hsa-mir-196b	0.101869
Neoplasms	hsa-mir-194	0.101865
Thyroid Neoplasms	hsa-mir-214	0.101723
Adenocarcinoma	hsa-mir-15a	0.101617
Carcinoma Non-Small-Cell Lung	hsa-mir-335	0.101586
Glioblastoma	hsa-mir-335	0.101577
Lupus Vulgaris	hsa-mir-7	0.101539
Colorectal Neoplasms	hsa-mir-302d	0.101536
Endometrial Neoplasms	hsa-mir-26a	0.101513
Glioma	hsa-mir-23b	0.101456
Lung Neoplasms	hsa-mir-1290	0.101418
Leukemia Myeloid Acute	hsa-mir-192	0.101398
Colorectal Neoplasms	hsa-mir-187	0.101378
Schizophrenia	hsa-mir-125b	0.101378
Pancreatic Neoplasms	hsa-mir-134	0.101371
Pre-Eclampsia	hsa-mir-34a	0.101371
Ovarian Neoplasms	hsa-mir-574	0.101357
Head and Neck Neoplasms	hsa-mir-192	0.10127
Carcinoma Squamous Cell	hsa-mir-23b	0.101263
Colorectal Neoplasms	hsa-mir-484	0.101194
Uterine Cervical Neoplasms	hsa-mir-26a	0.101187
Adenoviridae Infections	hsa-mir-30e	0.101107
Carcinoma Basal Cell	hsa-mir-133a	0.101066
Ovarian Neoplasms	hsa-mir-509	0.101031
Prostatic Neoplasms	hsa-mir-485	0.101002
Heart Failure	hsa-mir-1290	0.100988
Ovarian Neoplasms	hsa-mir-18b	0.100953
Uterine Cervical Neoplasms	hsa-mir-210	0.100878
Pancreatic Neoplasms	hsa-mir-130a	0.100839
Pancreatic Neoplasms	hsa-mir-22	0.100838
Carcinoma Renal Cell	hsa-mir-96	0.100797
Heart Failure	hsa-mir-490	0.10064
Pancreatic Neoplasms	hsa-mir-137	0.100597
Colorectal Neoplasms	hsa-mir-1286	0.100589
Heart Failure	hsa-mir-506	0.100578
Nasopharyngeal Neoplasms	hsa-mir-19a	0.100549
Pancreatic Neoplasms	hsa-mir-302a	0.100536
Carcinoma Renal Cell	hsa-mir-520d	0.100532
Endometriosis	hsa-mir-34b	0.100475
Ovarian Neoplasms	hsa-mir-922	0.100462
Medulloblastoma	hsa-mir-212	0.100452
Prostatic Neoplasms	hsa-mir-520d	0.100447
Melanoma	hsa-mir-95	0.10044
Urinary Bladder Neoplasms	hsa-mir-30e	0.10043
Lupus Vulgaris	hsa-mir-23b	0.100422
Rectal Neoplasms	hsa-mir-133a	0.100396
Prostatic Neoplasms	hsa-mir-324	0.100393
Prostatic Neoplasms	hsa-mir-92b	0.100379
Melanoma	hsa-mir-765	0.100368
Adenoviridae Infections	hsa-let-7g	0.100345
Endometriosis	hsa-mir-15b	0.100328
Endometriosis	hsa-mir-195	0.100328
Neoplasms	hsa-mir-96	0.100297
Carcinoma Non-Small-Cell Lung	hsa-mir-30c	0.10028
Heart Failure	hsa-mir-338	0.100267
Carcinoma Hepatocellular	hsa-mir-513b	0.100261
Carcinoma Hepatocellular	hsa-mir-513c	0.100261
Carcinoma Non-Small-Cell Lung	hsa-mir-301a	0.10025
Mesothelioma	hsa-mir-125b	0.100188
Carcinoma Renal Cell	hsa-mir-1224	0.100137
Ovarian Neoplasms	hsa-mir-637	0.100121
Breast Neoplasms	hsa-mir-767	0.100101
Heart Failure	hsa-mir-302d	0.100083
Medulloblastoma	hsa-mir-205	0.100079
Hypertrophy	hsa-mir-125b	0.0999172
Carcinoma Non-Small-Cell Lung	hsa-mir-181c	0.0999157
Carcinoma Hepatocellular	hsa-mir-652	0.0998565
Carcinoma Renal Cell	hsa-mir-376b	0.0998194
Carcinoma Non-Small-Cell Lung	hsa-mir-140	0.0998124
Leukemia Myeloid Acute	hsa-mir-141	0.0997574
Head and Neck Neoplasms	hsa-mir-15b	0.0997294
Leukemia Myeloid Acute	hsa-mir-200c	0.0997069
Medulloblastoma	hsa-mir-101	0.0996862
Stomach Neoplasms	hsa-mir-216a	0.0996828
Ovarian Neoplasms	hsa-mir-519d	0.0996382
Neuroblastoma	hsa-mir-125b	0.0995933
Schizophrenia	hsa-mir-20a	0.0995554
Pre-Eclampsia	hsa-mir-29a	0.0994982
Hypertrophy	hsa-mir-20a	0.0994878
Colorectal Neoplasms	hsa-mir-383	0.0994647
Carcinoma Renal Cell	hsa-mir-519d	0.0994552
Urinary Bladder Neoplasms	hsa-mir-525	0.0994463
Lung Neoplasms	hsa-mir-410	0.0994011
Pancreatic Neoplasms	hsa-mir-491	0.099391
Gastrointestinal Neoplasms	hsa-mir-16	0.0993884
Glioblastoma	hsa-mir-140	0.0993803
Adenoviridae Infections	hsa-mir-133b	0.0993743
Adenocarcinoma	hsa-mir-26a	0.0993514
Neoplasms	hsa-mir-153	0.0993256
Carcinoma Renal Cell	hsa-mir-153	0.0993184
Carcinoma Non-Small-Cell Lung	hsa-mir-148b	0.0993111
Endometriosis	hsa-mir-122	0.0993046
Muscular Disorders Atrophic	hsa-mir-200b	0.0992151
Glioblastoma	hsa-mir-517a	0.0991503
Colorectal Neoplasms	hsa-mir-296	0.0991454
Leukemia Lymphocytic Chronic B-Cell	hsa-mir-126	0.0990886
Salivary Gland Neoplasms	hsa-mir-34a	0.0990747
Heart Failure	hsa-mir-320d	0.0990429
Pancreatic Neoplasms	hsa-mir-328	0.0989787
Lung Neoplasms	hsa-mir-298	0.098976
Gastrointestinal Neoplasms	hsa-mir-199a	0.0988226
Melanoma	hsa-mir-484	0.0987901
Carcinoma Squamous Cell	hsa-mir-224	0.0987483
Lymphoma	hsa-mir-106b	0.0987266
Urinary Bladder Neoplasms	hsa-let-7g	0.0987117
Endometriosis	hsa-mir-9	0.0986767
Carcinoma Basal Cell	hsa-mir-126	0.098664
Neoplasms	hsa-mir-376b	0.0986549
Carcinoma Non-Small-Cell Lung	hsa-mir-208a	0.0986491
Lupus Vulgaris	hsa-mir-181b	0.0985521
Leukemia Myeloid Acute	hsa-mir-195	0.0984615
Breast Neoplasms	hsa-mir-449a	0.0984471
Carcinoma Renal Cell	hsa-mir-196b	0.0984425
Carcinoma Renal Cell	hsa-mir-18b	0.0983925
Breast Neoplasms	hsa-mir-147b	0.0983558
Retinoblastoma	hsa-mir-125b	0.0982467
Uterine Cervical Neoplasms	hsa-let-7b	0.0982412
Colorectal Neoplasms	hsa-mir-1287	0.098238
Colorectal Neoplasms	hsa-mir-641	0.098238
Muscular Disorders Atrophic	hsa-mir-15a	0.0982327
Neuroblastoma	hsa-mir-29b	0.0982051
Thyroid Neoplasms	hsa-mir-150	0.0981751
Carcinoma Squamous Cell	hsa-mir-208b	0.0981413
Colorectal Neoplasms	hsa-mir-449b	0.098088
Prostatic Neoplasms	hsa-mir-1224	0.0980563
Autistic Disorder	hsa-mir-133a	0.0980489
Ovarian Neoplasms	hsa-mir-98	0.0979737
Adrenocortical Carcinoma	hsa-mir-214	0.0979677
Colorectal Neoplasms	hsa-mir-517a	0.097935
Glioblastoma	hsa-mir-301a	0.0979279
Adenoviridae Infections	hsa-mir-32	0.0979108
Pancreatic Neoplasms	hsa-mir-342	0.0979092
Thyroid Neoplasms	hsa-mir-29c	0.097871
Lupus Vulgaris	hsa-mir-503	0.0978707
Neoplasms Squamous Cell	hsa-mir-16	0.0978508
Stomach Neoplasms	hsa-mir-216b	0.0978434
Colorectal Neoplasms	hsa-mir-488	0.0978258
Carcinoma Renal Cell	hsa-mir-574	0.0978237
Medulloblastoma	hsa-mir-23a	0.0978146
Urinary Bladder Neoplasms	hsa-mir-23b	0.0978071
Muscular Disorders Atrophic	hsa-mir-30b	0.0977944
Medulloblastoma	hsa-mir-519d	0.0977939
Stomach Neoplasms	hsa-mir-337	0.0976984
Rectal Neoplasms	hsa-mir-126	0.0976573
Head and Neck Neoplasms	hsa-mir-148a	0.0976557
Neoplasms Squamous Cell	hsa-mir-199a	0.0975793
Carcinoma Non-Small-Cell Lung	hsa-mir-22	0.0975716
Thyroid Neoplasms	hsa-mir-15b	0.0975672
Leukemia Myeloid Acute	hsa-mir-122	0.0975607
Adenocarcinoma	hsa-let-7b	0.0974776
Colorectal Neoplasms	hsa-mir-571	0.0974173
Muscular Disorders Atrophic	hsa-mir-92a	0.0973834
Carcinoma Squamous Cell	hsa-mir-204	0.0973754
Glioma	hsa-mir-208b	0.0973714
Mesothelioma	hsa-mir-29b	0.097357
Neoplasms	hsa-mir-574	0.0973513
Myelodysplastic Syndromes	hsa-mir-29a	0.0973164
Colorectal Neoplasms	hsa-mir-181d	0.0973122
Glioblastoma	hsa-mir-148b	0.0973046
Breast Neoplasms	hsa-mir-519a	0.0972598
Lung Neoplasms	hsa-mir-217	0.0972387
Carcinoma Hepatocellular	hsa-mir-495	0.0971988
Thyroid Neoplasms	hsa-mir-34c	0.0971592
Lupus Vulgaris	hsa-mir-31	0.0971392
Melanoma	hsa-mir-492	0.0971346
Muscular Disorders Atrophic	hsa-mir-196a	0.0971274
Ovarian Neoplasms	hsa-mir-548c	0.0971244
Salivary Gland Neoplasms	hsa-mir-29a	0.0970472
Breast Neoplasms	hsa-mir-671	0.0970307
Hypertrophy	hsa-mir-29b	0.0969512
Carcinoma Squamous Cell	hsa-mir-503	0.0969238
Glioma	hsa-mir-503	0.0969064
Endometriosis	hsa-mir-182	0.0968463
Lupus Vulgaris	hsa-mir-20b	0.0967787
Musculoskeletal Abnormalities	hsa-mir-155	0.0967196
Carcinoma Renal Cell	hsa-mir-922	0.0967168
Stomach Neoplasms	hsa-mir-451	0.0966698
Colorectal Neoplasms	hsa-mir-765	0.096656
Heart Failure	hsa-mir-298	0.0966407
Carcinoma Renal Cell	hsa-mir-375	0.0966091
Lung Neoplasms	hsa-mir-130b	0.0965813
Carcinoma Non-Small-Cell Lung	hsa-mir-491	0.0965612
Melanoma	hsa-mir-449b	0.0965344
Melanoma	hsa-mir-181d	0.0965057
Adenoviridae Infections	hsa-mir-183	0.0964941
Barrett Esophagus	hsa-mir-146a	0.0964756
Colorectal Neoplasms	hsa-mir-376c	0.0964261
Heart Failure	hsa-mir-519b	0.0964066
Lupus Vulgaris	hsa-mir-204	0.0963636
Head and Neck Neoplasms	hsa-mir-34b	0.0963519
Hematologic Neoplasms	hsa-mir-155	0.0963067
Thyroid Neoplasms	hsa-mir-192	0.096269
Carcinoma Renal Cell	hsa-mir-637	0.0962424
Head and Neck Neoplasms	hsa-mir-429	0.0961775
Esophageal Neoplasms	hsa-mir-23a	0.0961269
Heart Failure	hsa-mir-217	0.0961108
Hypertrophy	hsa-mir-145	0.0961098
Prostatic Neoplasms	hsa-mir-367	0.0960715
Melanoma	hsa-mir-376c	0.0959915
Lymphoma Primary Effusion	hsa-mir-155	0.0959641
Carcinoma Non-Small-Cell Lung	hsa-mir-302a	0.0959528
Gastrointestinal Neoplasms	hsa-mir-133a	0.0959231
Melanoma	hsa-mir-139	0.0959152
Melanoma	hsa-mir-325	0.0958903
Melanoma	hsa-mir-708	0.0958881
Neoplasms	hsa-mir-637	0.095851
Glioma	hsa-mir-219	0.0958345
Stomach Neoplasms	hsa-mir-489	0.0958032
Head and Neck Neoplasms	hsa-mir-122	0.0957831
Pancreatic Neoplasms	hsa-mir-362	0.0957304
Mesothelioma	hsa-mir-145	0.095723
Hodgkin Disease	hsa-mir-146a	0.0957172
Carcinoma Renal Cell	hsa-mir-516a	0.0956911
Neoplasms	hsa-mir-375	0.0956845
Muscular Dystrophy Duchenne	hsa-mir-155	0.0956802
Adenoviridae Infections	hsa-mir-23b	0.095655
Esophageal Neoplasms	hsa-mir-212	0.0956421
Ovarian Neoplasms	hsa-mir-144	0.0956215
Lung Neoplasms	hsa-mir-382	0.0955774
Adenoviridae Infections	hsa-mir-184	0.0955444
Carcinoma Squamous Cell	hsa-mir-199b	0.0955272
Carcinoma Squamous Cell	hsa-mir-494	0.0955244
Hepatitis C	hsa-mir-125b	0.0955137
Leukemia Myeloid Acute	hsa-mir-9	0.0954793
Adrenocortical Carcinoma	hsa-mir-200a	0.0954246
Glioma	hsa-mir-199b	0.0954155
Tuberculosis Pulmonary	hsa-mir-20a	0.0954124
Melanoma	hsa-mir-1290	0.0954083
Carcinoma Renal Cell	hsa-mir-10a	0.0953364
Carcinoma Squamous Cell	hsa-mir-219	0.0953202
Breast Neoplasms	hsa-mir-513b	0.0953043
Breast Neoplasms	hsa-mir-513c	0.0953043
Leukemia Myeloid Acute	hsa-mir-429	0.0952578
Lupus Vulgaris	hsa-mir-224	0.0952532
Heart Failure	hsa-mir-410	0.0952407
Stomach Neoplasms	hsa-mir-596	0.095209
Endometriosis	hsa-mir-146b	0.0951015
Uterine Cervical Neoplasms	hsa-let-7c	0.095086
Stomach Neoplasms	hsa-mir-1246	0.0950598
Head and Neck Neoplasms	hsa-mir-182	0.0950507
Glioma	hsa-mir-494	0.0950206
Carcinoma Hepatocellular	hsa-mir-136	0.0950154
Pancreatic Neoplasms	hsa-mir-302b	0.0949767
Lupus Vulgaris	hsa-mir-199b	0.0949589
Rectal Neoplasms	hsa-mir-18a	0.0949565
Azoospermia	hsa-mir-146a	0.0949515
Carcinoma Renal Cell	hsa-mir-98	0.0949286
Pulmonary Disease Chronic Obstructive	hsa-mir-155	0.0949145
Adrenocortical Carcinoma	hsa-mir-150	0.0948911
Colonic Neoplasms	hsa-mir-23a	0.0948522
Medulloblastoma	hsa-mir-372	0.0948282
Autistic Disorder	hsa-mir-126	0.0948189
Neoplasms	hsa-mir-10a	0.0948101
Heart Failure	hsa-mir-191	0.0948053
Lupus Vulgaris	hsa-mir-219	0.0947924
Prostatic Neoplasms	hsa-mir-18b	0.0947636
Lymphoma	hsa-mir-222	0.0947276
Ovarian Neoplasms	hsa-mir-423	0.0946984
Melanoma	hsa-mir-135a	0.0946684
Huntington Disease	hsa-mir-155	0.0946607
Schizophrenia	hsa-mir-145	0.0945793
Adenocarcinoma	hsa-let-7c	0.0945725
Neoplasms	hsa-mir-509	0.0944635
Tuberculosis Pulmonary	hsa-mir-125b	0.0944569
Stomach Neoplasms	hsa-mir-628	0.0944237
Carcinoma Squamous Cell	hsa-mir-483	0.0944157
Mouth Neoplasms	hsa-mir-17	0.0943483
Retinoblastoma	hsa-mir-145	0.0943266
Pancreatic Neoplasms	hsa-mir-320a	0.0943234
Breast Neoplasms	hsa-mir-502	0.0942365
Cholangiocarcinoma	hsa-mir-155	0.0942189
Carcinoma Non-Small-Cell Lung	hsa-mir-342	0.0942161
Schizophrenia	hsa-mir-19b	0.0941936
Endometriosis	hsa-mir-525	0.0941664
Adrenocortical Carcinoma	hsa-mir-29c	0.094151
Endometriosis	hsa-mir-206	0.094146
Pituitary Neoplasms	hsa-mir-17	0.0941442
Muscular Disorders Atrophic	hsa-mir-26a	0.0941432
Stomach Neoplasms	hsa-mir-520e	0.0941316
Hepatitis B	hsa-mir-17	0.0941311
Esophageal Neoplasms	hsa-mir-106a	0.0940988
Carcinoma Non-Small-Cell Lung	hsa-mir-137	0.0940902
Carcinoma Basal Cell	hsa-mir-19a	0.0940742
Hypertrophy	hsa-mir-19b	0.0940699
Stomach Neoplasms	hsa-mir-193a	0.0940083
Colorectal Neoplasms	hsa-mir-325	0.0940015
Carcinoma Non-Small-Cell Lung	hsa-mir-320a	0.0939157
Neoplasms	hsa-mir-99b	0.0938925
Breast Neoplasms	hsa-mir-520f	0.0938485
Breast Neoplasms	hsa-mir-520g	0.0938485
Colonic Neoplasms	hsa-mir-203	0.0938345
Breast Neoplasms	hsa-mir-1302	0.0938198
Urinary Bladder Neoplasms	hsa-mir-20b	0.0938102
Pancreatic Neoplasms	hsa-mir-432	0.0938041
Ovarian Neoplasms	hsa-mir-497	0.0937402
Lupus Vulgaris	hsa-mir-483	0.0936758
Stomach Neoplasms	hsa-mir-190a	0.0936573
Heart Failure	hsa-mir-513a	0.0936394
Glioblastoma	hsa-mir-432	0.0935423
Neoplasms Squamous Cell	hsa-mir-133a	0.0934928
Urinary Bladder Neoplasms	hsa-mir-204	0.0934831
Breast Neoplasms	hsa-mir-659	0.093441
Carcinoma Renal Cell	hsa-mir-548c	0.093409
Ovarian Neoplasms	hsa-mir-490	0.0933693
Carcinoma Hepatocellular	hsa-mir-548a	0.0933235
Pancreatic Neoplasms	hsa-mir-663a	0.093309
Stomach Neoplasms	hsa-mir-500a	0.0932902
Salivary Gland Neoplasms	hsa-mir-125b	0.0932761
Urinary Bladder Neoplasms	hsa-mir-208b	0.093261
Sarcoma Kaposi	hsa-mir-155	0.0932461
Breast Neoplasms	hsa-mir-652	0.0932254
Pre-Eclampsia	hsa-mir-125b	0.0932118
Autistic Disorder	hsa-mir-18a	0.0932112
Leukemia Myeloid Acute	hsa-mir-125a	0.093196
Esophageal Neoplasms	hsa-mir-30a	0.0931638
Head and Neck Neoplasms	hsa-mir-206	0.0931626
Adrenocortical Carcinoma	hsa-mir-181a	0.0931475
Heart Failure	hsa-mir-149	0.0931137
Heart Failure	hsa-mir-498	0.0930682
Tuberculosis Pulmonary	hsa-mir-29b	0.0930434
Endometriosis	hsa-mir-93	0.0930295
Breast Neoplasms	hsa-mir-422a	0.0929925
Endometriosis	hsa-mir-27a	0.0929739
Lung Neoplasms	hsa-mir-1286	0.092909
Lung Neoplasms	hsa-mir-320d	0.0928855
Neuroblastoma	hsa-mir-221	0.0928726
Thyroid Neoplasms	hsa-mir-148a	0.0928687
Carcinoma Hepatocellular	hsa-mir-598	0.0928685
[truncated: 182,156 more rows]
